# Supplementary material for: Borders of Cis-Regulatory DNA Sequences Preferentially Harbor the Divergent Transcription Factor Binding Motifs in the Human Genome
Source: Front Genet. 2018 Nov 22;9:571. doi: 10.3389/fgene.2018.00571 (PMC6261980; doi:10.3389/fgene.2018.00571)
Supplement: Supplementary file 2 [file Table_1.XLSX]

## Sheet: 20180211_Supplimentary_table1
Supplementary Table S1. The information for the motifs used in this study.
Total 972 human motifs were downloaded from the Cis-BP database (Weirauch et al. 2014). The information of corresponding TFs and their DNA-binding domain (DBD) family were obtained from Cis-BP database. Lineage data were downloaded from TimeTree database (Hedges et al. 2006). The pioneer TFs were reported by Vernimmen and Bickmore (2015). JASPAR motifs were obtained from the JASPAR database (Khan…
No.	Motif	corresponding_TF	DBD_family	MPI	Lineage	JASPAR	Non-redundant	ChIP_seq	Pioneer_TF	Expression_pattern
1	M5507_1.02	HESX1	Homeobox	0	Human	1	0	0	0	Ubiquitous expression
2	M3480_1.02	IRF7	IRF	0	Human	1	0	0	0	Ubiquitous expression
3	M3449_1.02	IRF8	IRF	0	Human	1	1	0	0	Tissue-elevated expression
4	M5580_1.02	IRF9	IRF	0	Human	1	0	1	0	Ubiquitous expression
5	M2321_1.02	TP63	P53	0	Human	1	0	0	1	Tissue-elevated expression
6	M1928_1.02	NFKB1	RHD	0	Human	1	0	0	0	Ubiquitous expression
7	M2925_1.02	RUNX1	Runt	0	Human	1	0	1	0	Ubiquitous expression
8	M1916_1.02	TEAD1	TEA	0	Human	1	0	1	0	Ubiquitous expression
9	M2301_1.02	NFYB	UNKNOWN	0	Human	1	0	1	0	Ubiquitous expression
10	M2305_1.02	NRF1	UNKNOWN	0	Human	1	1	1	0	Ubiquitous expression
11	M5958_1.02	ZBED1	UNKNOWN	0	Human	1	1	1	0	Ubiquitous expression
12	M2323_1.02	ZBTB33	zf-C2H2	0	Human	1	1	1	0	Ubiquitous expression
13	M1911_1.02	SRY	HMG_box	0.00099	Primate	1	0	0	0	Tissue-elevated expression
14	M5782_1.02	RHOXF1	Homeobox	0.0105	Primate	1	1	0	0	Tissue-elevated expression
15	M2270_1.02	DUX4	Homeobox	0.01915	Primate	1	0	0	0	Not detected
16	M3079_1.02	TFCP2	CP2	0.02054	Mammalia	1	0	0	0	Ubiquitous expression
17	M0896_1.02	VENTX	Homeobox	0.05073	Mammalia	1	0	0	0	Ubiquitous expression
18	M1969_1.02	INSM1	zf-C2H2	0.05894	Mammalia	1	1	0	0	Tissue-elevated expression
19	M3285_1.02	FOXP3	Fork_head	0.06456	Mammalia	1	0	0	0	Tissue-elevated expression
20	M1883_1.02	IRF2	IRF	0.06728	Mammalia	1	0	1	0	Ubiquitous expression
21	M1882_1.02	IRF1	IRF	0.06852	Mammalia	1	0	1	0	Ubiquitous expression
22	M5293_1.02	ATF7	bZIP_1	0.07181	Vertebrata	1	0	1	0	Ubiquitous expression
23	M5320_1.02	CENPB	CENP-B_N	0.07456	Mammalia	1	0	0	0	Ubiquitous expression
24	M1950_1.02	ZNF354C	zf-C2H2	0.0751	Mammalia	1	0	1	0	Ubiquitous expression
25	M1887_1.02	MZF1	zf-C2H2	0.0777	Mammalia	1	0	0	0	Ubiquitous expression
26	M3129_1.02	DUXA	Homeobox	0.07981	Mammalia	1	0	0	0	Not detected
27	M2389_1.02	THAP1	THAP	0.08498	Mammalia	1	1	0	0	Ubiquitous expression
28	M5672_1.02	NOTO	Homeobox	0.08578	Mammalia	1	0	0	0	Not detected
29	M4051_1.02	TEAD4	TEA	0.1289	Vertebrata	1	0	1	0	Tissue-elevated expression
30	M1968_1.02	EBF1	HLH	0.13397	Mammalia	1	1	1	0	Tissue-elevated expression
31	M2273_1.02	E2F6	E2F_TDP	0.13809	Mammalia	1	0	1	0	Ubiquitous expression
32	M5753_1.02	PROX1	Prox1	0.14103	Vertebrata	1	1	0	0	Tissue-elevated expression
33	M2324_1.02	ZNF263	zf-C2H2	0.14457	Mammalia	1	1	1	0	Ubiquitous expression
34	M3715_1.02	PAX4	Homeobox,PAX	0.14892	Mammalia	1	0	0	0	Tissue-elevated expression
35	M1951_1.02	HINFP	zf-C2H2	0.15145	Vertebrata	1	1	1	0	Ubiquitous expression
36	M1901_1.02	RREB1	zf-C2H2	0.16	Vertebrata	1	1	0	0	Ubiquitous expression
37	M5303_1.02	BCL6B	zf-C2H2	0.16368	Vertebrata	1	1	1	0	Ubiquitous expression
38	M5628_1.02	MGA	HLH,T-box	0.16621	Vertebrata	1	0	1	0	Ubiquitous expression
39	M4052_1.02	TEAD3	TEA	0.17745	Vertebrata	1	1	1	0	Ubiquitous expression
40	M5512_1.02	HIC2	zf-C2H2	0.18015	Vertebrata	1	1	0	0	Ubiquitous expression
41	M3062_1.02	ZBTB7B	zf-C2H2	0.18771	Vertebrata	1	0	1	0	Ubiquitous expression
42	M1957_1.02	CTCF	zf-C2H2	0.19015	Vertebrata	1	1	1	0	Ubiquitous expression
43	M1929_1.02	TP53	P53	0.19135	Vertebrata	1	1	0	1	Ubiquitous expression
44	M5517_1.02	HMBOX1	Homeobox	0.20354	Vertebrata	1	1	1	0	Ubiquitous expression
45	M5647_1.02	MYBL2	Myb	0.20611	Vertebrata	1	0	0	0	Tissue-elevated expression
46	M5414_1.02	ESX1	Homeobox	0.2098	Mammalia	1	0	0	0	Tissue-elevated expression
47	M5744_1.02	POU5F1B	Homeobox,Pou	0.22338	Vertebrata	1	0	0	1	Ubiquitous expression
48	M5493_1.02	GMEB2	SAND	0.22809	Vertebrata	1	0	1	0	Ubiquitous expression
49	M3568_1.02	MIXL1	Homeobox	0.22849	Vertebrata	1	0	1	0	Tissue-elevated expression
50	M5506_1.02	HES7	HLH	0.24249	Vertebrata	1	0	0	0	Not detected
51	M5363_1.02	E2F8	E2F_TDP	0.25074	Vertebrata	1	0	0	0	Ubiquitous expression
52	M2985_1.02	BATF3	bZIP_1	0.25722	Vertebrata	1	0	0	0	Ubiquitous expression
53	M5643_1.02	MYBL1	Myb	0.25842	Vertebrata	1	1	0	0	Tissue-elevated expression
54	M3058_1.02	MLXIPL	HLH	0.25998	Vertebrata	1	0	0	0	Tissue-elevated expression
55	M1956_1.02	REST	zf-C2H2	0.26055	Vertebrata	1	1	1	0	Ubiquitous expression
56	M5430_1.02	FIGLA	HLH	0.26167	Vertebrata	1	0	0	0	Not detected
57	M5504_1.02	HES5	HLH	0.26192	Vertebrata	1	0	0	0	Tissue-elevated expression
58	M5362_1.02	E2F7	E2F_TDP	0.26275	Vertebrata	1	0	1	0	Ubiquitous expression
59	M1926_1.02	ZEB1	zf-C2H2,Homeobox	0.26284	Vertebrata	1	1	1	0	Ubiquitous expression
60	M5491_1.02	GLIS2	zf-C2H2	0.27231	Vertebrata	1	0	1	0	Ubiquitous expression
61	M0668_1.02	E2F2	E2F_TDP	0.27431	Vertebrata	1	0	0	0	Tissue-elevated expression
62	M5490_1.02	GLIS1	zf-C2H2	0.27447	Vertebrata	1	0	1	0	Tissue-elevated expression
63	M1856_1.02	E2F1	E2F_TDP	0.27705	Vertebrata	1	0	1	0	Tissue-elevated expression
64	M3579_1.02	MTF1	zf-C2H2	0.27884	Vertebrata	1	1	0	0	Ubiquitous expression
65	M5497_1.02	GRHL1	CP2	0.28793	Vertebrata	1	1	0	0	Tissue-elevated expression
66	M4186_1.02	ZNF740	zf-C2H2	0.28807	Vertebrata	1	1	1	0	Ubiquitous expression
67	M5972_1.02	ZNF410	zf-C2H2	0.30064	Vertebrata	1	1	0	0	Ubiquitous expression
68	M1578_1.02	SOX4	HMG_box	0.30422	Vertebrata	1	0	0	0	Ubiquitous expression
69	M3518_1.02	ZBTB7A	zf-C2H2	0.30498	Vertebrata	1	0	1	0	Ubiquitous expression
70	M5335_1.02	CUX2	CUT,Homeobox	0.30642	Vertebrata	1	0	0	0	Tissue-elevated expression
71	M4129_1.02	ZBTB7C	zf-C2H2	0.31076	Vertebrata	1	1	0	0	Ubiquitous expression
72	M3019_1.02	CUX1	CUT,Homeobox	0.31132	Vertebrata	1	0	1	0	Ubiquitous expression
73	M5944_1.02	VAX1	Homeobox	0.31908	Vertebrata	1	0	0	0	Not detected
74	M3145_1.02	E2F3	E2F_TDP	0.32529	Vertebrata	1	1	0	0	Ubiquitous expression
75	M5567_1.02	HSF4	HSF_DNA-bind	0.32568	Vertebrata	1	0	0	0	Ubiquitous expression
76	M1955_1.02	STAT1	STAT_bind	0.32582	Vertebrata	1	0	1	0	Ubiquitous expression
77	M5621_1.02	MEIS3	Homeobox	0.33177	Vertebrata	1	0	0	0	Tissue-elevated expression
78	M2974_1.02	ATF4	bZIP_1	0.3344	Vertebrata	1	0	1	0	Ubiquitous expression
79	M2999_1.02	BHLHE40	HLH	0.33693	Vertebrata	1	0	1	0	Ubiquitous expression
80	M3113_1.02	BHLHE41	HLH	0.33693	Vertebrata	1	0	0	0	Ubiquitous expression
81	M2288_1.02	HSF1	HSF_DNA-bind	0.33851	Vertebrata	1	0	1	0	Ubiquitous expression
82	M5669_1.02	NFKB2	RHD	0.34133	Vertebrata	1	0	0	0	Ubiquitous expression
83	M3444_1.02	HSF2	HSF_DNA-bind	0.34295	Vertebrata	1	1	0	0	Ubiquitous expression
84	M1961_1.02	STAT3	STAT_bind	0.34526	Vertebrata	1	1	1	0	Ubiquitous expression
85	M3706_1.02	TP73	P53	0.34677	Vertebrata	1	0	0	0	Tissue-elevated expression
86	M5551_1.02	HOXC12	Homeobox	0.3489	Vertebrata	1	0	0	0	Not detected
87	M1924_1.02	REL	RHD	0.35186	Vertebrata	1	0	0	0	Ubiquitous expression
88	M5557_1.02	HOXD12	Homeobox	0.35446	Vertebrata	1	0	0	0	Tissue-elevated expression
89	M1908_1.02	SPIB	Ets	0.35584	Vertebrata	1	1	0	0	Tissue-elevated expression
90	M5865_1.02	SPIC	Ets	0.36256	Vertebrata	1	0	0	0	Tissue-elevated expression
91	M0890_1.02	LHX6	Homeobox	0.37209	Vertebrata	1	0	0	0	Ubiquitous expression
92	M1518_1.02	NFATC2	RHD	0.3726	Vertebrata	1	0	0	0	Ubiquitous expression
93	M1517_1.02	NFATC3	RHD	0.3726	Vertebrata	1	1	0	0	Ubiquitous expression
94	M3431_1.02	HOXA13	Homeobox	0.37309	Vertebrata	1	0	0	0	Tissue-elevated expression
95	M5561_1.02	HOXD13	Homeobox	0.37309	Vertebrata	1	0	0	0	Tissue-elevated expression
96	M5746_1.02	POU6F2	Homeobox,Pou	0.37322	Bilateria	1	0	0	0	Tissue-elevated expression
97	M3617_1.02	NFE2	bZIP_1	0.37765	Vertebrata	1	0	1	0	Tissue-elevated expression
98	M1841_1.02	AR	zf-C4	0.37765	Vertebrata	1	1	0	0	Tissue-elevated expression
99	M3355_1.02	NR3C1	zf-C4	0.37765	Vertebrata	1	0	1	0	Ubiquitous expression
100	M1433_1.02	NR3C2	zf-C4	0.37765	Vertebrata	1	0	0	0	Ubiquitous expression
101	M1972_1.02	PLAG1	zf-C2H2	0.38235	Bilateria	1	1	0	0	Ubiquitous expression
102	M3903_1.02	SOX10	HMG_box	0.3897	Bilateria	1	1	0	0	Tissue-elevated expression
103	M1904_1.02	SOX9	HMG_box	0.3946	Bilateria	1	0	0	1	Ubiquitous expression
104	M2281_1.02	FOXH1	Fork_head	0.40121	Bilateria	1	1	0	0	Not detected
105	M5945_1.02	VAX2	Homeobox	0.40735	Bilateria	1	0	0	0	Tissue-elevated expression
106	M0629_1.02	DMRT3	DM	0.41206	Bilateria	1	1	0	0	Tissue-elevated expression
107	M2307_1.02	PRDM1	zf-C2H2	0.41295	Bilateria	1	1	1	0	Ubiquitous expression
108	M3041_1.02	CEBPD	bZIP_1	0.42614	Bilateria	1	0	0	0	Ubiquitous expression
109	M5889_1.02	TBX21	T-box	0.43014	Bilateria	1	0	1	0	Tissue-elevated expression
110	M3746_1.02	POU1F1	Homeobox,Pou	0.43483	Bilateria	1	0	0	0	Not detected
111	M5541_1.02	HOXB2	Homeobox	0.43723	Bilateria	1	0	0	0	Ubiquitous expression
112	M3799_1.02	SPI1	Ets	0.44034	Bilateria	1	0	1	1	Ubiquitous expression
113	M5323_1.02	CREB3	bZIP_1	0.44888	Bilateria	1	0	1	0	Ubiquitous expression
114	M5838_1.02	SOX8	HMG_box	0.44961	Bilateria	1	1	0	0	Tissue-elevated expression
115	M5571_1.02	ID4	HLH	0.45057	Bilateria	1	0	0	0	Tissue-elevated expression
116	M0897_1.02	HOXB13	Homeobox	0.45087	Bilateria	1	0	0	0	Tissue-elevated expression
117	M5553_1.02	HOXC13	Homeobox	0.45087	Bilateria	1	0	0	0	Tissue-elevated expression
118	M4021_1.02	TBX15	T-box	0.45095	Bilateria	1	0	0	0	Tissue-elevated expression
119	M3660_1.02	NFE2L2	bZIP_1	0.45131	Bilateria	1	0	1	0	Ubiquitous expression
120	M5592_1.02	KLF14	zf-C2H2	0.45268	Bilateria	1	0	0	0	Not detected
121	M3447_1.02	XBP1	bZIP_1	0.45558	Bilateria	1	1	0	0	Ubiquitous expression
122	M1930_1.02	RELA	RHD	0.46232	Bilateria	1	1	1	0	Ubiquitous expression
123	M5689_1.02	NRL	bZIP_1	0.46316	Bilateria	1	1	0	0	Ubiquitous expression
124	M1878_1.02	HNF1A	Homeobox	0.48833	Bilateria	1	1	1	0	Tissue-elevated expression
125	M3405_1.02	HNF1B	Homeobox	0.48833	Bilateria	1	0	0	0	Tissue-elevated expression
126	M4019_1.02	EOMES	T-box	0.49132	Bilateria	1	0	0	0	Tissue-elevated expression
127	M5873_1.02	TBR1	T-box	0.49132	Bilateria	1	0	0	0	Tissue-elevated expression
128	M1889_1.02	MAX	HLH,bZIP_1	0.50234	Bilateria	1	0	1	0	Ubiquitous expression
129	M5593_1.02	KLF16	zf-C2H2	0.50262	Bilateria	1	0	1	0	Ubiquitous expression
130	M1894_1.02	PPARG	zf-C4	0.5054	Bilateria	1	0	1	0	Ubiquitous expression
131	M1934_1.02	ESR1	zf-C4	0.50667	Bilateria	1	0	0	0	Tissue-elevated expression
132	M2065_1.02	ESR2	zf-C4	0.50667	Bilateria	1	1	0	0	Tissue-elevated expression
133	M2295_1.02	MAFF	bZIP_1	0.50766	Bilateria	1	0	1	0	Ubiquitous expression
134	M3533_1.02	MAFG	bZIP_1	0.51271	Bilateria	1	0	1	0	Ubiquitous expression
135	M2296_1.02	MAFK	bZIP_1	0.51271	Bilateria	1	0	1	0	Ubiquitous expression
136	M5949_1.02	VSX1	Homeobox	0.51393	Bilateria	1	0	0	0	Tissue-elevated expression
137	M2320_1.02	TFAP2C	TF_AP-2	0.51723	Bilateria	1	0	0	1	Tissue-elevated expression
138	M5501_1.02	GSC2	Homeobox	0.51883	Bilateria	1	0	0	0	Tissue-elevated expression
139	M1925_1.02	CEBPA	bZIP_1	0.52439	Bilateria	1	0	1	0	Tissue-elevated expression
140	M2268_1.02	CEBPB	bZIP_1	0.52439	Bilateria	1	0	1	0	Ubiquitous expression
141	M3043_1.02	CEBPE	bZIP_1	0.52439	Bilateria	1	0	0	0	Tissue-elevated expression
142	M3794_1.02	PROP1	Homeobox	0.52714	Bilateria	1	0	0	0	Not detected
143	M5690_1.02	OLIG1	HLH	0.53773	Bilateria	1	0	0	0	Tissue-elevated expression
144	M5634_1.02	MNT	HLH	0.53803	Bilateria	1	0	1	0	Ubiquitous expression
145	M5587_1.02	JDP2	bZIP_1	0.54864	Bilateria	1	0	0	0	Ubiquitous expression
146	M2930_1.02	RUNX3	Runt	0.54876	Bilateria	1	0	1	0	Tissue-elevated expression
147	M2310_1.02	RUNX2	Runt	0.54945	Bilateria	1	1	0	0	Ubiquitous expression
148	M3964_1.02	ZNF143	zf-C2H2	0.55096	Bilateria	1	1	1	0	Ubiquitous expression
149	M3505_1.02	LEF1	HMG_box	0.55369	Bilateria	1	0	1	0	Tissue-elevated expression
150	M3645_1.02	RARA	zf-C4	0.56479	Bilateria	1	0	1	0	Ubiquitous expression
151	M2319_1.02	TCF7L2	HMG_box	0.56994	Bilateria	1	1	1	0	Ubiquitous expression
152	M5721_1.02	PKNOX1	Homeobox	0.57124	Bilateria	1	0	1	0	Ubiquitous expression
153	M2322_1.02	USF2	HLH	0.57978	Bilateria	1	0	1	0	Ubiquitous expression
154	M5547_1.02	HOXC11	Homeobox	0.57993	Bilateria	1	0	0	0	Tissue-elevated expression
155	M5425_1.02	ETV6	Ets	0.59132	Bilateria	1	0	1	0	Ubiquitous expression
156	M5555_1.02	HOXD11	Homeobox	0.59211	Bilateria	1	1	0	0	Tissue-elevated expression
157	M1917_1.02	USF1	HLH	0.60326	Bilateria	1	0	1	0	Ubiquitous expression
158	M3780_1.02	POU6F1	Homeobox	0.60664	Bilateria	1	0	0	0	Ubiquitous expression
159	M4165_1.02	GLIS3	zf-C2H2	0.60724	Bilateria	1	0	0	0	Tissue-elevated expression
160	M2272_1.02	E2F4	E2F_TDP	0.60962	Bilateria	1	1	1	0	Ubiquitous expression
161	M5825_1.02	SOX21	HMG_box	0.61944	Bilateria	1	1	0	0	Tissue-elevated expression
162	M3063_1.02	CLOCK	HLH	0.62712	Bilateria	1	0	0	0	Ubiquitous expression
163	M5805_1.02	SCRT2	zf-C2H2	0.63575	Bilateria	1	0	1	0	Not detected
164	M3045_1.02	CEBPG	bZIP_1	0.63686	Metazoa	1	0	1	0	Ubiquitous expression
165	M2279_1.02	FOSL1	bZIP_1	0.63773	Bilateria	1	0	1	0	Tissue-elevated expression
166	M1857_1.02	NFIL3	bZIP_1	0.63845	Bilateria	1	0	1	0	Ubiquitous expression
167	M3877_1.02	SNAI2	zf-C2H2	0.65255	Bilateria	1	0	0	0	Ubiquitous expression
168	M5500_1.02	GSC	Homeobox	0.65388	Bilateria	1	0	0	0	Tissue-elevated expression
169	M4147_1.02	ZIC1	zf-C2H2	0.65976	Bilateria	1	1	0	0	Tissue-elevated expression
170	M4149_1.02	ZIC3	zf-C2H2	0.65976	Bilateria	1	0	0	0	Not detected
171	M5965_1.02	ZIC4	zf-C2H2	0.65976	Bilateria	1	0	0	0	Tissue-elevated expression
172	M2289_1.02	JUN	bZIP_1	0.668	Bilateria	1	0	1	1	Ubiquitous expression
173	M2291_1.02	JUNB	bZIP_1	0.668	Bilateria	1	0	1	0	Ubiquitous expression
174	M2292_1.02	JUND	bZIP_1	0.668	Bilateria	1	0	1	0	Ubiquitous expression
175	M2280_1.02	FOSL2	bZIP_1	0.6691	Bilateria	1	0	1	0	Ubiquitous expression
176	M5325_1.02	CREB3L1	bZIP_1	0.67095	Bilateria	1	0	1	0	Ubiquitous expression
177	M4064_1.02	TGIF1	Homeobox	0.68104	Bilateria	1	0	0	0	Ubiquitous expression
178	M5934_1.02	TGIF2	Homeobox	0.68104	Bilateria	1	0	1	0	Ubiquitous expression
179	M2384_1.02	ESRRA	zf-C4	0.68434	Bilateria	1	1	1	0	Ubiquitous expression
180	M3210_1.02	ESRRB	zf-C4	0.68434	Bilateria	1	0	0	0	Tissue-elevated expression
181	M5623_1.02	MEOX1	Homeobox	0.68871	Bilateria	1	0	0	0	Ubiquitous expression
182	M5624_1.02	MEOX2	Homeobox	0.68871	Bilateria	1	0	0	0	Tissue-elevated expression
183	M3282_1.02	FOXO4	Fork_head	0.68956	Metazoa	1	0	0	0	Tissue-elevated expression
184	M0810_1.02	GCM1	GCM	0.6906	Bilateria	1	0	0	0	Tissue-elevated expression
185	M2278_1.02	FOS	bZIP_1	0.69327	Bilateria	1	1	1	0	Ubiquitous expression
186	M3881_1.02	SMAD3	MH1	0.6979	Bilateria	1	1	0	0	Ubiquitous expression
187	M5480_1.02	GBX1	Homeobox	0.70246	Bilateria	1	0	0	0	Tissue-elevated expression
188	M5481_1.02	GBX2	Homeobox	0.70246	Bilateria	1	0	0	0	Not detected
189	M5632_1.02	MLX	HLH	0.70249	Bilateria	1	0	1	0	Ubiquitous expression
190	M3185_1.02	ELF5	Ets	0.70438	Bilateria	1	0	0	0	Tissue-elevated expression
191	M0894_1.02	LBX1	Homeobox	0.70898	Bilateria	1	0	0	0	Tissue-elevated expression
192	M5594_1.02	LBX2	Homeobox	0.70898	Bilateria	1	0	0	0	Tissue-elevated expression
193	M5544_1.02	HOXC10	Homeobox	0.7116	Bilateria	1	0	0	0	Tissue-elevated expression
194	M5875_1.02	TBX1	T-box	0.71433	Bilateria	1	0	0	0	Tissue-elevated expression
195	M3004_1.02	T	T-box	0.71575	Bilateria	1	0	0	0	Not detected
196	M5882_1.02	TBX19	T-box	0.71575	Bilateria	1	0	0	0	Ubiquitous expression
197	M5300_1.02	BARX1	Homeobox	0.71625	Bilateria	1	0	0	0	Tissue-elevated expression
198	M5804_1.02	SCRT1	zf-C2H2	0.71771	Bilateria	1	0	1	0	Tissue-elevated expression
199	M3025_1.02	CDX1	Homeobox	0.71911	Bilateria	1	1	0	0	Tissue-elevated expression
200	M2267_1.02	CDX2	Homeobox	0.71911	Bilateria	1	0	0	0	Tissue-elevated expression
201	M2390_1.02	EHF	Ets	0.73464	Bilateria	1	0	0	0	Ubiquitous expression
202	M3713_1.02	PAX3	Homeobox,PAX	0.73993	Bilateria	1	1	0	0	Tissue-elevated expression
203	M5709_1.02	PAX7	Homeobox,PAX	0.73993	Bilateria	1	0	0	1	Tissue-elevated expression
204	M1910_1.02	SRF	SRF-TF	0.74233	Metazoa	1	1	1	0	Ubiquitous expression
205	M5635_1.02	MNX1	Homeobox	0.74244	Bilateria	1	0	0	0	Tissue-elevated expression
206	M1897_1.02	PAX6	Homeobox,PAX	0.74445	Bilateria	1	0	0	0	Tissue-elevated expression
207	M1936_1.02	HNF4A	zf-C4	0.74487	Bilateria	1	0	1	0	Tissue-elevated expression
208	M2388_1.02	SREBF2	HLH	0.7452	Bilateria	1	0	1	0	Ubiquitous expression
209	M3214_1.02	ELF3	Ets	0.74599	Bilateria	1	0	1	0	Ubiquitous expression
210	M3107_1.02	DBP	bZIP_1	0.74611	Bilateria	1	0	0	0	Ubiquitous expression
211	M4048_1.02	TEF	bZIP_1	0.74611	Bilateria	1	0	0	0	Ubiquitous expression
212	M3350_1.02	GLI2	zf-C2H2	0.74655	Bilateria	1	1	1	0	Tissue-elevated expression
213	M1838_1.02	TFAP2A	TF_AP-2	0.75323	Bilateria	1	0	0	0	Tissue-elevated expression
214	M3280_1.02	FOXO3	Fork_head	0.75649	Metazoa	1	0	0	0	Ubiquitous expression
215	M2938_1.02	TFAP2B	TF_AP-2	0.75851	Bilateria	1	0	0	0	Tissue-elevated expression
216	M3191_1.02	EN1	Homeobox	0.76182	Bilateria	1	0	0	0	Tissue-elevated expression
217	M5502_1.02	GSX1	Homeobox	0.76458	Bilateria	1	0	0	0	Not detected
218	M5503_1.02	GSX2	Homeobox	0.76458	Bilateria	1	0	0	0	Not detected
219	M5636_1.02	MSC	HLH	0.76681	Bilateria	1	0	0	0	Ubiquitous expression
220	M1851_1.02	NR2F1	zf-C4	0.76722	Bilateria	1	0	1	0	Ubiquitous expression
221	M1944_1.02	NKX3-1	Homeobox	0.76778	Bilateria	1	0	0	0	Tissue-elevated expression
222	M3637_1.02	NKX3-2	Homeobox	0.76778	Bilateria	1	0	0	0	Tissue-elevated expression
223	M5896_1.02	TBX4	T-box	0.77263	Metazoa	1	0	0	0	Tissue-elevated expression
224	M4026_1.02	TBX5	T-box	0.77263	Metazoa	1	0	0	0	Tissue-elevated expression
225	M1880_1.02	NHLH1	HLH	0.77584	Bilateria	1	0	0	0	Not detected
226	M5722_1.02	PKNOX2	Homeobox	0.77673	Bilateria	1	0	0	0	Ubiquitous expression
227	M3337_1.02	GCM2	GCM	0.77707	Bilateria	1	1	0	0	Not detected
228	M3771_1.02	POU3F1	Homeobox,Pou	0.78229	Bilateria	1	0	0	0	Tissue-elevated expression
229	M2306_1.02	POU2F2	Homeobox,Pou	0.78415	Bilateria	1	0	0	0	Tissue-elevated expression
230	M5955_1.02	YY2	zf-C2H2	0.78603	Metazoa	1	1	1	0	Tissue-elevated expression
231	M0892_1.02	EMX1	Homeobox	0.78769	Bilateria	1	0	0	0	Tissue-elevated expression
232	M5932_1.02	TFEC	HLH	0.78774	Bilateria	1	0	0	0	Tissue-elevated expression
233	M5857_1.02	SPDEF	Ets	0.78812	Bilateria	1	0	0	0	Tissue-elevated expression
234	M5310_1.02	BSX	Homeobox	0.78889	Bilateria	1	0	0	0	Not detected
235	M5697_1.02	ONECUT3	CUT,Homeobox	0.79209	Bilateria	1	0	0	0	Tissue-elevated expression
236	M3009_1.02	POU3F2	Homeobox,Pou	0.79323	Bilateria	1	0	0	0	Tissue-elevated expression
237	M3008_1.02	POU3F3	Homeobox,Pou	0.79323	Bilateria	1	0	0	0	Tissue-elevated expression
238	M1919_1.02	YY1	zf-C2H2	0.79343	Metazoa	1	1	1	0	Ubiquitous expression
239	M3427_1.02	ONECUT1	CUT,Homeobox	0.79666	Bilateria	1	0	0	0	Tissue-elevated expression
240	M3013_1.02	KLF13	zf-C2H2	0.79697	Metazoa	1	0	1	0	Ubiquitous expression
241	M5738_1.02	POU3F4	Homeobox,Pou	0.7983	Bilateria	1	0	0	0	Tissue-elevated expression
242	M1899_1.02	RORA	zf-C4	0.79998	Bilateria	1	0	0	0	Ubiquitous expression
243	M5388_1.02	EMX2	Homeobox	0.80062	Bilateria	1	0	0	0	Tissue-elevated expression
244	M1875_1.02	HLF	bZIP_1	0.80195	Bilateria	1	1	1	0	Ubiquitous expression
245	M5294_1.02	BARHL2	Homeobox	0.80406	Bilateria	1	1	0	0	Tissue-elevated expression
246	M5394_1.02	EN2	Homeobox	0.80506	Bilateria	1	0	0	0	Not detected
247	M5471_1.02	FOXO6	Fork_head	0.80617	Metazoa	1	0	0	0	Ubiquitous expression
248	M2286_1.02	HNF4G	zf-C4	0.80663	Bilateria	1	0	1	0	Tissue-elevated expression
249	M5307_1.02	BHLHE22	HLH	0.81131	Bilateria	1	0	0	0	Tissue-elevated expression
250	M5308_1.02	BHLHE23	HLH	0.81131	Bilateria	1	0	0	0	Not detected
251	M5691_1.02	OLIG2	HLH	0.81131	Bilateria	1	0	0	0	Tissue-elevated expression
252	M5693_1.02	OLIG3	HLH	0.81131	Bilateria	1	0	0	0	Not detected
253	M3673_1.02	ONECUT2	CUT,Homeobox	0.81294	Bilateria	1	1	0	0	Tissue-elevated expression
254	M3562_1.02	MEIS1	Homeobox	0.81363	Bilateria	1	1	0	0	Ubiquitous expression
255	M5619_1.02	MEIS2	Homeobox	0.81363	Bilateria	1	0	0	0	Ubiquitous expression
256	M2387_1.02	SREBF1	HLH	0.82229	Bilateria	1	0	1	0	Ubiquitous expression
257	M5799_1.02	RXRB	zf-C4	0.82646	Bilateria	1	0	1	0	Ubiquitous expression
258	M5800_1.02	RXRG	zf-C4	0.82646	Bilateria	1	0	0	0	Tissue-elevated expression
259	M5427_1.02	EVX1	Homeobox	0.83565	Bilateria	1	1	0	0	Tissue-elevated expression
260	M3232_1.02	EVX2	Homeobox	0.83565	Bilateria	1	0	0	0	Tissue-elevated expression
261	M5604_1.02	LMX1A	Homeobox	0.83598	Bilateria	1	0	0	0	Tissue-elevated expression
262	M5605_1.02	LMX1B	Homeobox	0.83598	Bilateria	1	0	0	0	Tissue-elevated expression
263	M5542_1.02	HOXB3	Homeobox	0.83713	Bilateria	1	0	0	0	Ubiquitous expression
264	M3753_1.02	PITX3	Homeobox	0.8393	Bilateria	1	0	0	0	Tissue-elevated expression
265	M1231_1.02	POU2F1	Homeobox,Pou	0.83999	Bilateria	1	1	0	0	Ubiquitous expression
266	M3774_1.02	POU4F1	Homeobox,Pou	0.84085	Bilateria	1	1	0	0	Not detected
267	M3010_1.02	POU4F2	Homeobox,Pou	0.84085	Bilateria	1	0	0	0	Tissue-elevated expression
268	M3776_1.02	POU4F3	Homeobox,Pou	0.84085	Bilateria	1	0	0	0	Not detected
269	M2303_1.02	NR2C2	zf-C4	0.84715	Bilateria	1	1	1	0	Ubiquitous expression
270	M3709_1.02	PAX1	PAX	0.85221	Bilateria	1	0	0	0	Tissue-elevated expression
271	M5711_1.02	PAX9	PAX	0.85221	Bilateria	1	0	0	0	Tissue-elevated expression
272	M5653_1.02	NEUROG2	HLH	0.85281	Bilateria	1	0	0	0	Not detected
273	M0900_1.02	SHOX	Homeobox	0.85319	Bilateria	1	0	0	0	Not detected
274	M2314_1.02	SP2	zf-C2H2	0.85419	Metazoa	1	0	1	0	Ubiquitous expression
275	M3672_1.02	NR4A2	zf-C4	0.85697	Bilateria	1	1	0	0	Tissue-elevated expression
276	M2943_1.02	TFAP4	HLH	0.85932	Metazoa	1	0	1	0	Ubiquitous expression
277	M1971_1.02	EGR1	zf-C2H2	0.85942	Metazoa	1	0	1	0	Ubiquitous expression
278	M3176_1.02	EGR2	zf-C2H2	0.85942	Metazoa	1	1	1	0	Tissue-elevated expression
279	M3178_1.02	EGR3	zf-C2H2	0.85942	Metazoa	1	0	0	0	Ubiquitous expression
280	M3630_1.02	EGR4	zf-C2H2	0.85942	Metazoa	1	0	0	0	Tissue-elevated expression
281	M4058_1.02	TFE3	HLH	0.86467	Metazoa	1	1	1	0	Ubiquitous expression
282	M5931_1.02	TFEB	HLH	0.86467	Metazoa	1	0	0	0	Ubiquitous expression
283	M4025_1.02	TBX2	T-box	0.86473	Metazoa	1	0	0	0	Tissue-elevated expression
284	M3607_1.02	NFIA	MH1	0.87078	Metazoa	1	1	1	0	Ubiquitous expression
285	M1970_1.02	NFIC	MH1	0.87078	Metazoa	1	0	1	0	Ubiquitous expression
286	M5664_1.02	NFIX	MH1	0.87078	Metazoa	1	0	0	0	Ubiquitous expression
287	M3640_1.02	NKX6-1	Homeobox	0.87119	Bilateria	1	0	0	0	Tissue-elevated expression
288	M3641_1.02	NKX6-2	Homeobox	0.87119	Bilateria	1	0	0	0	Tissue-elevated expression
289	M1890_1.02	NFYA	CBFB_NFYA	0.87183	Metazoa	1	1	1	1	Ubiquitous expression
290	M5344_1.02	DLX6	Homeobox	0.87234	Bilateria	1	0	0	0	Tissue-elevated expression
291	M5584_1.02	ISX	Homeobox	0.87757	Metazoa	1	0	0	0	Tissue-elevated expression
292	M5883_1.02	TBX20	T-box	0.88389	Bilateria	1	1	0	0	Tissue-elevated expression
293	M2283_1.02	FOXP1	Fork_head	0.88735	Metazoa	1	0	1	0	Ubiquitous expression
294	M2385_1.02	FOXP2	Fork_head	0.88735	Metazoa	1	0	0	0	Ubiquitous expression
295	M3575_1.02	MYF6	HLH	0.88929	Bilateria	1	1	0	0	Tissue-elevated expression
296	M5479_1.02	GATA5	GATA	0.89162	Bilateria	1	0	0	0	Tissue-elevated expression
297	M1848_1.02	PAX5	PAX	0.89534	Bilateria	1	1	0	0	Tissue-elevated expression
298	M5652_1.02	NEUROD2	HLH	0.89605	Bilateria	1	1	0	0	Tissue-elevated expression
299	M5602_1.02	LHX9	Homeobox	0.9016	Bilateria	1	0	0	0	Tissue-elevated expression
300	M1898_1.02	PBX1	Homeobox	0.9016	Bilateria	1	1	0	1	Ubiquitous expression
301	M3457_1.02	PDX1	Homeobox	0.9016	Bilateria	1	0	0	0	Tissue-elevated expression
302	M6377_1.02	NKX2-8	Homeobox	0.9029	Bilateria	1	0	0	0	Tissue-elevated expression
303	M5509_1.02	HEY1	HLH	0.90381	Metazoa	1	1	0	0	Tissue-elevated expression
304	M5510_1.02	HEY2	HLH	0.90381	Metazoa	1	0	0	0	Tissue-elevated expression
305	M5856_1.02	SP8	zf-C2H2	0.91145	Metazoa	1	0	0	0	Tissue-elevated expression
306	M1869_1.02	GATA3	GATA	0.91309	Bilateria	1	0	1	1	Tissue-elevated expression
307	M1906_1.02	SP1	zf-C2H2	0.91726	Metazoa	1	0	1	0	Ubiquitous expression
308	M3934_1.02	SP3	zf-C2H2	0.91726	Metazoa	1	0	1	0	Ubiquitous expression
309	M3935_1.02	SP4	zf-C2H2	0.91726	Metazoa	1	0	0	0	Ubiquitous expression
310	M2275_1.02	ELF1	Ets	0.91778	Bilateria	1	0	1	0	Ubiquitous expression
311	M5377_1.02	ELF4	Ets	0.91778	Bilateria	1	0	1	0	Ubiquitous expression
312	M3576_1.02	MSX1	Homeobox	0.91889	Metazoa	1	0	0	0	Tissue-elevated expression
313	M3577_1.02	MSX2	Homeobox	0.91889	Metazoa	1	0	0	0	Tissue-elevated expression
314	M0887_1.02	HOXA2	Homeobox	0.92307	Bilateria	1	0	0	0	Ubiquitous expression
315	M3428_1.02	HOXA5	Homeobox	0.92307	Bilateria	1	1	0	0	Tissue-elevated expression
316	M0889_1.02	LHX2	Homeobox	0.92307	Bilateria	1	0	0	0	Tissue-elevated expression
317	M1884_1.02	MEF2A	SRF-TF	0.92307	Bilateria	1	1	0	0	Ubiquitous expression
318	M5616_1.02	MEF2B	SRF-TF	0.92307	Bilateria	1	0	0	0	Tissue-elevated expression
319	M2297_1.02	MEF2C	SRF-TF	0.92307	Bilateria	1	0	1	0	Ubiquitous expression
320	M3561_1.02	MEF2D	SRF-TF	0.92307	Bilateria	1	0	1	0	Ubiquitous expression
321	M3130_1.02	TCF3	HLH	0.92314	Metazoa	1	1	0	0	Ubiquitous expression
322	M5901_1.02	TCF4	HLH	0.92314	Metazoa	1	0	0	0	Ubiquitous expression
323	M3692_1.02	OTX1	Homeobox	0.93177	Metazoa	1	0	0	0	Tissue-elevated expression
324	M2391_1.02	KLF5	zf-C2H2	0.9353	Metazoa	1	1	0	0	Ubiquitous expression
325	M3693_1.02	OTX2	Homeobox	0.95017	Metazoa	1	1	0	1	Not detected
326	M3083_1.02	CREB1	bZIP_1	0.95468	Metazoa	1	1	1	0	Ubiquitous expression
327	M5583_1.02	ISL2	Homeobox	0.95987	Metazoa	1	1	0	0	Tissue-elevated expression
328	M5772_1.02	RAX2	Homeobox	0.96699	Metazoa	1	0	0	0	Not detected
329	M5941_1.02	UNCX	Homeobox	0.97714	Metazoa	1	0	0	0	Not detected
330	M5771_1.02	RAX	Homeobox	0.97853	Metazoa	1	0	0	0	Not detected
331	M3059_1.02	VSX2	Homeobox	0.97853	Metazoa	1	0	0	0	Not detected
332	M1892_1.02	NKX2-3	Homeobox	0.98488	Metazoa	1	1	0	0	Tissue-elevated expression
333	M1868_1.02	GATA2	GATA	0.99002	Metazoa	1	1	1	1	Tissue-elevated expression
334	M1860_1.02	ELK1	Ets	1	Metazoa	1	1	1	0	Ubiquitous expression
335	M3604_1.02	ELK3	Ets	1	Metazoa	1	0	0	0	Ubiquitous expression
336	M1903_1.02	ELK4	Ets	1	Metazoa	1	0	1	0	Ubiquitous expression
337	M5398_1.02	ERF	Ets	1	Metazoa	1	0	0	0	Ubiquitous expression
338	M3205_1.02	ERG	Ets	1	Metazoa	1	0	0	0	Ubiquitous expression
339	M4461_1.02	ETS1	Ets	1	Metazoa	1	0	1	0	Ubiquitous expression
340	M5420_1.02	ETV1	Ets	1	Metazoa	1	0	1	0	Tissue-elevated expression
341	M5421_1.02	ETV2	Ets	1	Metazoa	1	0	0	0	Tissue-elevated expression
342	M5422_1.02	ETV3	Ets	1	Metazoa	1	0	0	0	Ubiquitous expression
343	M3742_1.02	ETV4	Ets	1	Metazoa	1	0	1	0	Ubiquitous expression
344	M5424_1.02	ETV5	Ets	1	Metazoa	1	0	0	0	Ubiquitous expression
345	M5429_1.02	FEV	Ets	1	Metazoa	1	0	0	0	Tissue-elevated expression
346	M2277_1.02	FLI1	Ets	1	Metazoa	1	0	0	0	Ubiquitous expression
347	M3304_1.02	GABPA	Ets	1	Metazoa	1	0	1	0	Ubiquitous expression
348	M1965_1.02	FOXA1	Fork_head	1	Metazoa	1	1	1	1	Tissue-elevated expression
349	M5435_1.02	FOXB1	Fork_head	1	Metazoa	1	0	0	0	Tissue-elevated expression
350	M1864_1.02	FOXC1	Fork_head	1	Metazoa	1	0	0	0	Tissue-elevated expression
351	M5442_1.02	FOXC2	Fork_head	1	Metazoa	1	0	0	0	Tissue-elevated expression
352	M1863_1.02	FOXD1	Fork_head	1	Metazoa	1	0	0	0	Tissue-elevated expression
353	M5445_1.02	FOXD2	Fork_head	1	Metazoa	1	0	0	0	Tissue-elevated expression
354	M1862_1.02	FOXF2	Fork_head	1	Metazoa	1	1	0	0	Ubiquitous expression
355	M0719_1.02	FOXG1	Fork_head	1	Metazoa	1	0	0	0	Tissue-elevated expression
356	M1874_1.02	FOXI1	Fork_head	1	Metazoa	1	0	0	0	Tissue-elevated expression
357	M1865_1.02	FOXL1	Fork_head	1	Metazoa	1	0	0	0	Tissue-elevated expression
358	M5284_1.02	ALX3	Homeobox	1	Metazoa	1	1	0	0	Tissue-elevated expression
359	M5714_1.02	PHOX2A	Homeobox	1	Metazoa	1	0	0	0	Tissue-elevated expression
360	M3763_1.02	PRRX1	Homeobox	1	Metazoa	1	0	0	0	Ubiquitous expression
361	M2392_1.02	RFX2	RFX	1	Metazoa	1	1	0	1	Ubiquitous expression
362	M5775_1.02	RFX3	RFX	1	Metazoa	1	0	1	1	Tissue-elevated expression
363	M5777_1.02	RFX4	RFX	1	Metazoa	1	0	0	1	Tissue-elevated expression
364	M2309_1.02	RFX5	RFX	1	Metazoa	1	0	1	1	Ubiquitous expression
365	M3456_1.02	ING4	GAGA_bind	0	Human	0	0	0	0	Ubiquitous expression
366	M0893_1.02	ZFHX2	Homeobox	0	Human	0	0	1	0	Tissue-elevated expression
367	M0898_1.02	ZHX1	Homeobox	0	Human	0	0	1	0	Ubiquitous expression
368	M2988_1.02	BCL3	UNKNOWN	0	Human	0	0	1	0	Ubiquitous expression
369	M2993_1.02	BCLAF1	UNKNOWN	0	Human	0	0	1	0	Ubiquitous expression
370	M3234_1.02	BPTF	UNKNOWN	0	Human	0	0	0	0	Ubiquitous expression
371	M3007_1.02	BRF1	UNKNOWN	0	Human	0	0	1	0	Ubiquitous expression
372	M3744_1.02	CBFB	UNKNOWN	0	Human	0	0	1	0	Ubiquitous expression
373	M3017_1.02	CCNT2	UNKNOWN	0	Human	0	0	1	0	Ubiquitous expression
374	M2922_1.02	CEBPZ	UNKNOWN	0	Human	0	0	1	0	Ubiquitous expression
375	M3055_1.02	CHD2	UNKNOWN	0	Human	0	0	1	0	Ubiquitous expression
376	M3073_1.02	CNOT3	UNKNOWN	0	Human	0	0	0	0	Ubiquitous expression
377	M5322_1.02	CPEB1	UNKNOWN	0	Human	0	0	0	0	Tissue-elevated expression
378	M2997_1.02	CTNNB1	UNKNOWN	0	Human	0	0	0	0	Ubiquitous expression
379	M3076_1.02	EBF2	UNKNOWN	0	Human	0	0	0	0	Tissue-elevated expression
380	M3164_1.02	EBF3	UNKNOWN	0	Human	0	0	0	0	Tissue-elevated expression
381	M3163_1.02	EBF4	UNKNOWN	0	Human	0	0	0	0	Ubiquitous expression
382	M6210_1.02	ENO1	UNKNOWN	0	Human	0	0	0	0	Ubiquitous expression
383	M2994_1.02	ENSG00000261932	UNKNOWN	0	Human	0	0	0	0	NA
384	M3192_1.02	EP300	UNKNOWN	0	Human	0	0	1	0	Ubiquitous expression
385	M6251_1.02	FUBP1	UNKNOWN	0	Human	0	0	0	0	Ubiquitous expression
386	M3308_1.02	GABPB1	UNKNOWN	0	Human	0	0	1	0	Ubiquitous expression
387	M4059_1.02	GTF2B	UNKNOWN	0	Human	0	0	1	0	Ubiquitous expression
388	M3361_1.02	GTF3C2	UNKNOWN	0	Human	0	0	1	0	Ubiquitous expression
389	M3365_1.02	HDAC1	UNKNOWN	0	Human	0	0	1	0	Ubiquitous expression
390	M3366_1.02	HDAC2	UNKNOWN	0	Human	0	0	1	0	Ubiquitous expression
391	M3394_1.02	HLTF	UNKNOWN	0	Human	0	0	0	0	Ubiquitous expression
392	M3399_1.02	HMGN3	UNKNOWN	0	Human	0	0	1	0	Ubiquitous expression
393	M3516_1.02	LMO2	UNKNOWN	0	Human	0	0	0	0	Ubiquitous expression
394	M3522_1.02	LTF	UNKNOWN	0	Human	0	0	0	0	Tissue-elevated expression
395	M3621_1.02	NFE4_HUMAN	UNKNOWN	0	Human	0	0	0	0	NA
396	M3629_1.02	NFYC	UNKNOWN	0	Human	0	0	1	0	Ubiquitous expression
397	M3106_1.02	NR0B1	UNKNOWN	0	Human	0	0	0	0	Tissue-elevated expression
398	M3707_1.02	PARP1	UNKNOWN	0	Human	0	0	0	0	Ubiquitous expression
399	M3765_1.02	POLR3A	UNKNOWN	0	Human	0	0	1	0	Ubiquitous expression
400	M3674_1.02	POU2AF1	UNKNOWN	0	Human	0	0	0	0	Tissue-elevated expression
401	M3801_1.02	PURA	UNKNOWN	0	Human	0	0	0	0	Ubiquitous expression
402	M3803_1.02	RAD21	UNKNOWN	0	Human	0	0	1	0	Ubiquitous expression
403	M3868_1.02	SIN3A	UNKNOWN	0	Human	0	0	1	0	Ubiquitous expression
404	M3872_1.02	SIRT6	UNKNOWN	0	Human	0	0	1	0	Ubiquitous expression
405	M3898_1.02	SMC3	UNKNOWN	0	Human	0	0	1	0	Ubiquitous expression
406	M3942_1.02	SPZ1	UNKNOWN	0	Human	0	0	0	0	Tissue-elevated expression
407	M3999_1.02	TAF1	UNKNOWN	0	Human	0	0	1	0	Ubiquitous expression
408	M3524_1.02	TOPORS	UNKNOWN	0	Human	0	0	0	0	Ubiquitous expression
409	M3835_1.02	TRIM28	UNKNOWN	0	Human	0	0	1	0	Ubiquitous expression
410	M6556_1.02	ZNF350	UNKNOWN	0	Human	0	0	1	0	Ubiquitous expression
411	M4192_1.02	AC092364.1	zf-C2H2	0	Human	0	0	0	0	NA
412	M4192_1.02	ENSG00000178604	zf-C2H2	0	Human	0	0	0	0	NA
413	M4181_1.02	ENSG00000257482	zf-C2H2	0	Human	0	0	0	0	NA
414	M4164_1.02	ENSG00000263255	zf-C2H2	0	Human	0	0	0	0	NA
415	M4155_1.02	ZNF236	zf-C2H2	0	Human	0	0	0	0	Ubiquitous expression
416	M4158_1.02	ZNF271	zf-C2H2	0	Human	0	0	0	0	NA
417	M3836_1.02	ZNF423	zf-C2H2	0	Human	0	0	1	0	Ubiquitous expression
418	M4175_1.02	ZNF663	zf-C2H2	0	Human	0	0	0	0	NA
419	M4176_1.02	ZNF702	zf-C2H2	0	Human	0	0	0	0	NA
420	M4178_1.02	ZNF718	zf-C2H2	0	Human	0	0	0	0	NA
421	M4182_1.02	ZNF73	zf-C2H2	0	Human	0	0	0	0	NA
422	M4162_1.02	ZNF834	zf-C2H2	0	Human	0	0	0	0	NA
423	M4193_1.02	ZNF883	zf-C2H2	0	Human	0	0	0	0	NA
424	M4164_1.02	ZNF90	zf-C2H2	0	Human	0	0	0	0	Ubiquitous expression
425	M4185_1.02	ZNF679	zf-C2H2	0.00099	Primate	0	0	0	0	Not detected
426	M4185_1.02	ZNF735P	zf-C2H2	0.00099	Primate	0	0	0	0	NA
427	M4188_1.02	ZNF761	zf-C2H2	0.00099	Primate	0	0	0	0	NA
428	M4168_1.02	ENSG00000197025	zf-C2H2	0.00134	Primate	0	0	0	0	NA
429	M3120_1.02	DMRTA1	DM	0.00286	Primate	0	0	0	0	Ubiquitous expression
430	M3473_1.02	IRF3	IRF	0.00353	Primate	0	0	1	0	Ubiquitous expression
431	M3479_1.02	IRF5	IRF	0.00353	Primate	0	0	1	0	Ubiquitous expression
432	M4177_1.02	ENSG00000214534	zf-C2H2	0.00353	Primate	0	0	0	0	NA
433	M4177_1.02	ENSG00000215339	zf-C2H2	0.00353	Primate	0	0	0	0	NA
434	M4177_1.02	ZNF705A	zf-C2H2	0.00353	Primate	0	0	0	0	Tissue-elevated expression
435	M4177_1.02	ZNF705B	zf-C2H2	0.00353	Primate	0	0	0	0	Not detected
436	M4177_1.02	ZNF705D	zf-C2H2	0.00353	Primate	0	0	0	0	Not detected
437	M4177_1.02	ZNF705G	zf-C2H2	0.00353	Primate	0	0	0	0	Not detected
438	M0901_1.02	AC226150.2	Homeobox	0.00437	Primate	0	0	0	0	NA
439	M4170_1.02	ZNF595	zf-C2H2	0.00437	Primate	0	0	0	0	Ubiquitous expression
440	M3583_1.02	MXI1	HLH	0.00504	Primate	0	0	1	0	Ubiquitous expression
441	M3995_1.02	ZNF589	zf-C2H2	0.00672	Primate	0	0	1	0	Ubiquitous expression
442	M4191_1.02	ZNF806	zf-C2H2	0.01015	Primate	0	0	0	0	NA
443	M3125_1.02	DUX1	Homeobox	0.011	Primate	0	0	0	0	NA
444	M3127_1.02	DUX3	Homeobox	0.011	Primate	0	0	0	0	NA
445	M2270_1.02	AL592170.2	Homeobox	0.01915	Primate	0	0	0	0	NA
446	M2270_1.02	CT476828.2	Homeobox	0.01915	Primate	0	0	0	0	NA
447	M2270_1.02	DUX4L2	Homeobox	0.01915	Primate	0	0	0	0	Not detected
448	M2270_1.02	DUX4L3	Homeobox	0.01915	Primate	0	0	0	0	Not detected
449	M2270_1.02	DUX4L5	Homeobox	0.01915	Primate	0	0	0	0	Not detected
450	M2270_1.02	DUX4L6	Homeobox	0.01915	Primate	0	0	0	0	Not detected
451	M2270_1.02	ENSG00000215754	Homeobox	0.01915	Primate	0	0	0	0	NA
452	M2270_1.02	ENSG00000217642	Homeobox	0.01915	Primate	0	0	0	0	NA
453	M2270_1.02	ENSG00000224558	Homeobox	0.01915	Primate	0	0	0	0	NA
454	M2270_1.02	ENSG00000225958	Homeobox	0.01915	Primate	0	0	0	0	NA
455	M2270_1.02	ENSG00000226866	Homeobox	0.01915	Primate	0	0	0	0	NA
456	M2270_1.02	ENSG00000227522	Homeobox	0.01915	Primate	0	0	0	0	NA
457	M2270_1.02	ENSG00000228710	Homeobox	0.01915	Primate	0	0	0	0	NA
458	M2270_1.02	ENSG00000230380	Homeobox	0.01915	Primate	0	0	0	0	NA
459	M2270_1.02	ENSG00000230776	Homeobox	0.01915	Primate	0	0	0	0	NA
460	M2270_1.02	ENSG00000232923	Homeobox	0.01915	Primate	0	0	0	0	NA
461	M2270_1.02	ENSG00000233294	Homeobox	0.01915	Primate	0	0	0	0	NA
462	M2270_1.02	ENSG00000233361	Homeobox	0.01915	Primate	0	0	0	0	NA
463	M2270_1.02	ENSG00000233698	Homeobox	0.01915	Primate	0	0	0	0	NA
464	M2270_1.02	ENSG00000233794	Homeobox	0.01915	Primate	0	0	0	0	NA
465	M2270_1.02	ENSG00000234550	Homeobox	0.01915	Primate	0	0	0	0	NA
466	M2270_1.02	ENSG00000236207	Homeobox	0.01915	Primate	0	0	0	0	NA
467	M2270_1.02	ENSG00000237516	Homeobox	0.01915	Primate	0	0	0	0	NA
468	M2270_1.02	ENSG00000250589	Homeobox	0.01915	Primate	0	0	0	0	NA
469	M4131_1.02	ZNF628	zf-C2H2	0.02428	Mammalia	0	0	0	0	Ubiquitous expression
470	M4167_1.02	ZNF541	zf-C2H2,Myb	0.03046	Mammalia	0	0	0	0	Tissue-elevated expression
471	M4163_1.02	ZNF425	zf-C2H2	0.03147	Mammalia	0	0	0	0	Ubiquitous expression
472	M4171_1.02	BX248098.1	zf-C2H2	0.0325	Mammalia	0	0	0	0	NA
473	M4171_1.02	ZNF658	zf-C2H2	0.0325	Mammalia	0	0	1	0	Ubiquitous expression
474	M5976_1.02	ZNF713	zf-C2H2	0.0337	Mammalia	0	0	0	0	Ubiquitous expression
475	M3951_1.02	ZNF187	zf-C2H2	0.03445	Mammalia	0	0	0	0	NA
476	M5980_1.02	ZNF784	zf-C2H2	0.03511	Mammalia	0	0	0	0	Ubiquitous expression
477	M5346_1.02	DPRX	Homeobox	0.03662	Mammalia	0	0	0	0	Tissue-elevated expression
478	M3908_1.02	SOX18	HMG_box	0.03728	Mammalia	0	0	0	0	Tissue-elevated expression
479	M4060_1.02	GTF3A	zf-C2H2	0.03952	Mammalia	0	0	0	0	Ubiquitous expression
480	M5981_1.02	ZSCAN4	zf-C2H2	0.03975	Mammalia	0	0	1	0	Tissue-elevated expression
481	M5568_1.02	HSFY1	HSF_DNA-bind	0.04071	Mammalia	0	0	0	0	Tissue-elevated expression
482	M5568_1.02	HSFY2	HSF_DNA-bind	0.04071	Mammalia	0	0	0	0	Tissue-elevated expression
483	M3363_1.02	GZF1	zf-C2H2	0.04246	Mammalia	0	0	0	0	Ubiquitous expression
484	M4145_1.02	ENSG00000269523	zf-C2H2	0.04279	Mammalia	0	0	0	0	NA
485	M4121_1.02	ZNF615	zf-C2H2	0.04497	Mammalia	0	0	0	0	Ubiquitous expression
486	M5974_1.02	ZNF524	zf-C2H2	0.04659	Mammalia	0	0	1	0	Ubiquitous expression
487	M0610_1.02	TET1	zf-CXXC	0.05025	Mammalia	0	0	0	0	Ubiquitous expression
488	M1359_1.02	MYPOP	Myb	0.0524	Mammalia	0	0	0	0	Ubiquitous expression
489	M2920_1.02	AIRE	SAND	0.05302	Mammalia	0	0	0	0	Tissue-elevated expression
490	M4142_1.02	ZNF697	zf-C2H2	0.05695	Mammalia	0	0	1	0	Ubiquitous expression
491	M3233_1.02	ZNF467	zf-C2H2	0.05719	Mammalia	0	0	0	0	Ubiquitous expression
492	M0609_1.02	DNMT1	zf-CXXC	0.06025	Mammalia	0	0	1	0	Ubiquitous expression
493	M1668_1.02	PRKRIR	THAP	0.06251	Mammalia	0	0	0	0	Ubiquitous expression
494	M4136_1.02	ZNF182	zf-C2H2	0.06552	Mammalia	0	0	0	0	Ubiquitous expression
495	M5967_1.02	ZNF232	zf-C2H2	0.06579	Mammalia	0	0	0	0	Ubiquitous expression
496	M1582_1.02	HMG20B	HMG_box	0.06754	Mammalia	0	0	1	0	Ubiquitous expression
497	M4169_1.02	ZNF581	zf-C2H2	0.07087	Mammalia	0	0	0	0	Ubiquitous expression
498	M3760_1.02	ZBTB16	zf-C2H2	0.07773	Vertebrata	0	0	0	0	Ubiquitous expression
499	M3475_1.02	IRF4	IRF	0.08031	Mammalia	0	0	0	0	Ubiquitous expression
500	M0398_1.02	ZSCAN10	zf-C2H2	0.08155	Mammalia	0	0	0	0	Not detected
501	M4159_1.02	ZNF316	zf-C2H2	0.08409	Mammalia	0	0	1	0	NA
502	M3218_1.02	TEAD2	TEA	0.08451	Mammalia	0	0	1	0	Ubiquitous expression
503	M5530_1.02	HOMEZ	Homeobox	0.08496	Mammalia	0	0	1	0	Ubiquitous expression
504	M4161_1.02	ZNF333	zf-C2H2	0.09238	Mammalia	0	0	0	0	Ubiquitous expression
505	M1594_1.02	SOX12	HMG_box	0.09524	Vertebrata	0	0	0	0	Ubiquitous expression
506	M3544_1.02	MAZ	zf-C2H2	0.10771	Vertebrata	0	0	1	0	Ubiquitous expression
507	M1266_1.02	IRF6	IRF	0.10805	Mammalia	0	0	0	0	Ubiquitous expression
508	M4635_1.02	STAT2	STAT_bind	0.10815	Mammalia	0	0	1	0	Ubiquitous expression
509	M6540_1.02	ZBTB4	zf-C2H2	0.10912	Mammalia	0	0	0	0	Ubiquitous expression
510	M3578_1.02	MTERF	mTERF	0.11158	Mammalia	0	0	0	0	Ubiquitous expression
511	M4166_1.02	ZNF521	zf-C2H2	0.11734	Vertebrata	0	0	1	0	Ubiquitous expression
512	M5973_1.02	ZSCAN16	zf-C2H2	0.11814	Mammalia	0	0	1	0	Ubiquitous expression
513	M4141_1.02	ZNF664	zf-C2H2	0.11858	Mammalia	0	0	1	0	Ubiquitous expression
514	M3122_1.02	DMRTC2	DM	0.12018	Mammalia	0	0	0	0	Tissue-elevated expression
515	M4551_1.02	ZNF274	zf-C2H2	0.12113	Mammalia	0	0	1	0	Ubiquitous expression
516	M5970_1.02	ZNF282	zf-C2H2	0.12301	Vertebrata	0	0	0	0	Ubiquitous expression
517	M0404_1.02	ZNF202	zf-C2H2	0.12308	Mammalia	0	0	1	0	Ubiquitous expression
518	M0437_1.02	ZNF32	zf-C2H2	0.12607	Mammalia	0	0	0	0	Ubiquitous expression
519	M0603_1.02	CGBP	zf-CXXC	0.12657	Mammalia	0	0	0	0	NA
520	M6185_1.02	CXXC1	zf-CXXC	0.12657	Mammalia	0	0	0	0	Ubiquitous expression
521	M4134_1.02	ZFP1	zf-C2H2	0.12694	Mammalia	0	0	0	0	Ubiquitous expression
522	M0428_1.02	ZNF691	zf-C2H2	0.12935	Mammalia	0	0	0	0	Ubiquitous expression
523	M3857_1.02	SALL2	zf-C2H2	0.1315	Vertebrata	0	0	1	0	Ubiquitous expression
524	M5979_1.02	ZNF75A	zf-C2H2	0.13183	Mammalia	0	0	0	0	Ubiquitous expression
525	M4187_1.02	ZNF75C	zf-C2H2	0.13183	Mammalia	0	0	0	0	NA
526	M4187_1.02	ZNF75D	zf-C2H2	0.13183	Mammalia	0	0	0	0	Ubiquitous expression
527	M5971_1.02	ZKSCAN3	zf-C2H2	0.13218	Mammalia	0	0	0	0	Ubiquitous expression
528	M5971_1.02	ZKSCAN4	zf-C2H2	0.13218	Mammalia	0	0	0	0	Ubiquitous expression
529	M0198_1.02	C13orf38-SOHLH2	HLH	0.13262	Mammalia	0	0	0	0	NA
530	M0198_1.02	SOHLH2	HLH	0.13262	Mammalia	0	0	0	0	Tissue-elevated expression
531	M0895_1.02	ZFHX3	Homeobox	0.13409	Vertebrata	0	0	0	0	Ubiquitous expression
532	M1953_1.02	BRCA1	EIN3	0.13776	Mammalia	0	0	1	0	Ubiquitous expression
533	M0436_1.02	ZNF35	zf-C2H2	0.13826	Mammalia	0	0	0	0	Ubiquitous expression
534	M3057_1.02	DDIT3	bZIP_1	0.1389	Mammalia	0	0	0	0	Ubiquitous expression
535	M1358_1.02	TERF2	Myb	0.13935	Mammalia	0	0	0	0	Ubiquitous expression
536	M0433_1.02	AL662834.13	zf-C2H2	0.14369	Vertebrata	0	0	0	0	NA
537	M0433_1.02	AL844853.8	zf-C2H2	0.14369	Vertebrata	0	0	0	0	NA
538	M0433_1.02	CR388219.4	zf-C2H2	0.14369	Vertebrata	0	0	0	0	NA
539	M0433_1.02	CR759784.3	zf-C2H2	0.14369	Vertebrata	0	0	0	0	NA
540	M0433_1.02	ZBTB12	zf-C2H2	0.14369	Vertebrata	0	0	0	0	Ubiquitous expression
541	M3546_1.02	PATZ1	zf-C2H2	0.14373	Vertebrata	0	0	1	0	Ubiquitous expression
542	M6387_1.02	NR1I3	zf-C4	0.1452	Mammalia	0	0	0	0	Tissue-elevated expression
543	M3597_1.02	NANOG	Homeobox	0.14656	Mammalia	0	0	0	0	Tissue-elevated expression
544	M3905_1.02	SOX15	HMG_box	0.15168	Mammalia	0	0	0	0	Tissue-elevated expression
545	M0608_1.02	MLL	zf-CXXC	0.16981	Vertebrata	0	0	0	0	NA
546	M0408_1.02	ZKSCAN1	zf-C2H2	0.17268	Mammalia	0	0	1	0	Ubiquitous expression
547	M4154_1.02	ZNF219	zf-C2H2	0.17286	Vertebrata	0	0	0	0	Ubiquitous expression
548	M3386_1.02	HIC1	zf-C2H2	0.18015	Vertebrata	0	0	1	0	Ubiquitous expression
549	M1589_1.02	SOX30	HMG_box	0.18104	Vertebrata	0	0	0	0	Tissue-elevated expression
550	M4118_1.02	ZNF217	zf-C2H2	0.18311	Vertebrata	0	0	1	0	Ubiquitous expression
551	M0212_1.02	TCFL5	HLH	0.18466	Vertebrata	0	0	0	0	Ubiquitous expression
552	M0926_1.02	NANOGP1	Homeobox	0.18871	Vertebrata	0	0	0	0	NA
553	M3991_1.02	STAT6	STAT_bind	0.19178	Vertebrata	0	0	0	0	Ubiquitous expression
554	M3817_1.02	RELB	RHD	0.19397	Vertebrata	0	0	1	0	Ubiquitous expression
555	M6337_1.02	MBD2	MBD	0.19536	Vertebrata	0	0	1	0	Ubiquitous expression
556	M3890_1.02	SMAD6	MH1	0.19549	Vertebrata	0	0	0	0	Tissue-elevated expression
557	M0307_1.02	ENSG00000250542	bZIP_1	0.19594	Vertebrata	0	0	0	0	NA
558	M0413_1.02	ZBTB1	zf-C2H2	0.20361	Vertebrata	0	0	1	0	Ubiquitous expression
559	M3982_1.02	STAT4	STAT_bind	0.20418	Vertebrata	0	0	0	0	Ubiquitous expression
560	M3759_1.02	PLAGL2	zf-C2H2	0.20542	Vertebrata	0	0	0	0	Ubiquitous expression
561	M3070_1.02	MYC	HLH	0.20586	Vertebrata	0	0	1	0	Ubiquitous expression
562	M6422_1.02	PLAGL1	zf-C2H2	0.20596	Vertebrata	0	0	0	0	Ubiquitous expression
563	M6385_1.02	NR1I2	zf-C4	0.20705	Vertebrata	0	0	0	0	Tissue-elevated expression
564	M4122_1.02	ZBTB11	zf-C2H2	0.21135	Vertebrata	0	0	1	0	Ubiquitous expression
565	M3103_1.02	CTCFL	zf-C2H2	0.21558	Vertebrata	0	0	0	0	Tissue-elevated expression
566	M5935_1.02	TGIF2LX	Homeobox	0.21859	Vertebrata	0	0	0	0	Tissue-elevated expression
567	M4062_1.02	GTF2I	GTF2I	0.21876	Vertebrata	0	0	0	0	Ubiquitous expression
568	M4072_1.02	TRERF1	zf-C2H2,Myb	0.22054	Vertebrata	0	0	0	0	Ubiquitous expression
569	M0906_1.02	VTN	Homeobox	0.22454	Vertebrata	0	0	0	0	Tissue-elevated expression
570	M4151_1.02	ZBTB6	zf-C2H2	0.22524	Vertebrata	0	0	0	0	Ubiquitous expression
571	M3157_1.02	E4F1	zf-C2H2	0.22732	Vertebrata	0	0	0	0	Ubiquitous expression
572	M4146_1.02	ZFX	zf-C2H2	0.23634	Vertebrata	0	0	1	0	Ubiquitous expression
573	M1963_1.02	ZFY	zf-C2H2	0.23634	Vertebrata	0	0	0	0	Ubiquitous expression
574	M1545_1.02	GMEB1	SAND	0.23802	Vertebrata	0	0	0	0	Ubiquitous expression
575	M2995_1.02	GTF2IRD1	GTF2I	0.24051	Vertebrata	0	0	0	0	Ubiquitous expression
576	M5835_1.02	SOX7	HMG_box	0.24141	Vertebrata	0	0	0	0	Ubiquitous expression
577	M5627_1.02	MESP1	HLH	0.24413	Vertebrata	0	0	0	0	Tissue-elevated expression
578	M5627_1.02	MESP2	HLH	0.24413	Vertebrata	0	0	0	0	Not detected
579	M3792_1.02	PRDM15	zf-C2H2	0.24535	Vertebrata	0	0	0	0	Ubiquitous expression
580	M3110_1.02	DEAF1	SAND	0.25098	Vertebrata	0	0	1	0	Ubiquitous expression
581	M3060_1.02	ZNF384	zf-C2H2	0.25348	Vertebrata	0	0	1	0	Ubiquitous expression
582	M2969_1.02	ATF3	bZIP_1	0.25474	Vertebrata	0	0	1	0	Ubiquitous expression
583	M3906_1.02	SOX17	HMG_box	0.26258	Vertebrata	0	0	0	0	Tissue-elevated expression
584	M0442_1.02	ZBTB3	zf-C2H2	0.26337	Vertebrata	0	0	0	0	Ubiquitous expression
585	M3891_1.02	SMAD7	MH1	0.26403	Vertebrata	0	0	0	0	Ubiquitous expression
586	M4132_1.02	ZFP161	zf-C2H2	0.26535	Vertebrata	0	0	0	0	NA
587	M0211_1.02	MLXIP	HLH	0.2678	Vertebrata	0	0	0	0	Ubiquitous expression
588	M0630_1.02	DMRT1	DM	0.27479	Vertebrata	0	0	0	0	Tissue-elevated expression
589	M5959_1.02	ZBTB49	zf-C2H2	0.27909	Vertebrata	0	0	1	0	Ubiquitous expression
590	M3287_1.02	FOXR1	Fork_head	0.2879	Vertebrata	0	0	0	0	Tissue-elevated expression
591	M3287_1.02	FOXR2	Fork_head	0.2879	Vertebrata	0	0	0	0	Tissue-elevated expression
592	M6111_1.02	ZBTB47	zf-C2H2	0.29184	Vertebrata	0	0	0	0	Ubiquitous expression
593	M6111_1.02	ZNF652	zf-C2H2	0.29184	Vertebrata	0	0	1	0	Ubiquitous expression
594	M3450_1.02	IKZF1	zf-C2H2	0.29411	Vertebrata	0	0	1	0	Tissue-elevated expression
595	M3450_1.02	IKZF4	zf-C2H2	0.29411	Vertebrata	0	0	0	0	Ubiquitous expression
596	M0888_1.02	NOBOX	Homeobox	0.29599	Vertebrata	0	0	0	0	Not detected
597	M1281_1.02	NAIF1	MADF_DNA_bdg	0.29989	Vertebrata	0	0	0	0	Ubiquitous expression
598	M3547_1.02	MECP2	MBD	0.30085	Vertebrata	0	0	0	0	Ubiquitous expression
599	M4024_1.02	TBX22	T-box	0.30189	Vertebrata	0	0	0	0	Tissue-elevated expression
600	M3710_1.02	PAX2	Homeobox,PAX	0.30255	Vertebrata	0	0	0	0	Tissue-elevated expression
601	M5750_1.02	PRDM4	zf-C2H2	0.30294	Vertebrata	0	0	1	0	Ubiquitous expression
602	M4089_1.02	VDR	zf-C4	0.30346	Vertebrata	0	0	0	0	Tissue-elevated expression
603	M1578_1.02	SOX11	HMG_box	0.30422	Vertebrata	0	0	0	0	Tissue-elevated expression
604	M0607_1.02	KDM2B	zf-CXXC	0.30605	Vertebrata	0	0	0	0	Ubiquitous expression
605	M3862_1.02	SETDB1	MBD	0.30699	Vertebrata	0	0	1	0	Ubiquitous expression
606	M0996_1.02	HDX	Homeobox	0.30813	Vertebrata	0	0	0	0	Ubiquitous expression
607	M3902_1.02	SNAI1	zf-C2H2	0.31061	Vertebrata	0	0	0	0	Tissue-elevated expression
608	M1592_1.02	SOX3	HMG_box	0.31582	Vertebrata	0	0	0	0	Tissue-elevated expression
609	M0424_1.02	SNAI3	zf-C2H2	0.31732	Vertebrata	0	0	0	0	Tissue-elevated expression
610	M3455_1.02	IKZF5	zf-C2H2	0.31879	Vertebrata	0	0	0	0	Ubiquitous expression
611	M2989_1.02	BCL6	zf-C2H2	0.31886	Vertebrata	0	0	1	0	Ubiquitous expression
612	M3364_1.02	HBP1	HMG_box	0.31893	Vertebrata	0	0	1	0	Ubiquitous expression
613	M1583_1.02	BBX	HMG_box	0.33128	Vertebrata	0	0	0	0	Ubiquitous expression
614	M3841_1.02	ZBTB42	zf-C2H2	0.33271	Vertebrata	0	0	0	0	Ubiquitous expression
615	M3841_1.02	ZNF238	zf-C2H2	0.33271	Vertebrata	0	0	0	0	NA
616	M2977_1.02	ATF5	bZIP_1	0.3344	Vertebrata	0	0	0	0	Tissue-elevated expression
617	M3860_1.02	SATB1	CUT,Homeobox	0.33761	Vertebrata	0	0	0	0	Ubiquitous expression
618	M3860_1.02	SATB2	CUT,Homeobox	0.33761	Vertebrata	0	0	0	0	Tissue-elevated expression
619	M3225_1.02	MECOM	zf-C2H2	0.34071	Vertebrata	0	0	0	0	Ubiquitous expression
620	M1861_1.02	PRDM16	zf-C2H2	0.34071	Vertebrata	0	0	0	0	Ubiquitous expression
621	M2981_1.02	BATF	bZIP_1	0.34441	Vertebrata	0	0	1	0	Tissue-elevated expression
622	M3068_1.02	MYB	Myb	0.34649	Vertebrata	0	0	1	0	Tissue-elevated expression
623	M3880_1.02	SMAD2	MH1	0.34671	Vertebrata	0	0	1	0	Ubiquitous expression
624	M3015_1.02	ZNF148	zf-C2H2	0.34793	Vertebrata	0	0	1	0	Ubiquitous expression
625	M0420_1.02	ZNF281	zf-C2H2	0.34793	Vertebrata	0	0	0	0	Ubiquitous expression
626	M1504_1.02	LCOR	HTH_psq	0.35236	Vertebrata	0	0	0	0	Ubiquitous expression
627	M4038_1.02	TCF7L1	HMG_box	0.35536	Vertebrata	0	0	0	0	Ubiquitous expression
628	M3985_1.02	STAT5A	STAT_bind	0.35991	Vertebrata	0	0	0	0	Ubiquitous expression
629	M3990_1.02	STAT5B	STAT_bind	0.35991	Vertebrata	0	0	0	0	Ubiquitous expression
630	M3504_1.02	TFCP2L1	CP2	0.3606	Vertebrata	0	0	0	0	Tissue-elevated expression
631	M3373_1.02	IKZF2	zf-C2H2	0.36215	Vertebrata	0	0	1	0	Tissue-elevated expression
632	M3373_1.02	IKZF3	zf-C2H2	0.36215	Vertebrata	0	0	0	0	Tissue-elevated expression
633	M0107_1.02	ARID5A	ARID	0.36567	Vertebrata	0	0	0	0	Ubiquitous expression
634	M3574_1.02	ARID5B	ARID	0.36567	Vertebrata	0	0	0	0	Ubiquitous expression
635	M3502_1.02	UBP1	CP2	0.36577	Vertebrata	0	0	0	0	Ubiquitous expression
636	M6544_1.02	HIVEP1	zf-C2H2	0.36602	Vertebrata	0	0	0	0	Ubiquitous expression
637	M3565_1.02	HIVEP2	zf-C2H2	0.36602	Vertebrata	0	0	0	0	Ubiquitous expression
638	M3565_1.02	HIVEP3	zf-C2H2	0.36602	Vertebrata	0	0	0	0	Ubiquitous expression
639	M2979_1.02	BACH1	bZIP_1	0.36684	Vertebrata	0	0	1	0	Ubiquitous expression
640	M2980_1.02	BACH2	bZIP_1	0.36761	Vertebrata	0	0	0	0	Tissue-elevated expression
641	M0890_1.02	LHX8	Homeobox	0.37209	Vertebrata	0	0	0	0	Tissue-elevated expression
642	M3611_1.02	NFATC1	RHD	0.3726	Vertebrata	0	0	0	0	Ubiquitous expression
643	M3613_1.02	NFATC4	RHD	0.3726	Vertebrata	0	0	0	0	Ubiquitous expression
644	M3787_1.02	PGR	zf-C4	0.37765	Vertebrata	0	0	0	0	Tissue-elevated expression
645	M1581_1.02	CIC	HMG_box	0.37821	Bilateria	0	0	0	0	Ubiquitous expression
646	M3686_1.02	CR847794.3	Homeobox,Pou	0.39087	Bilateria	0	0	0	0	NA
647	M4509_1.02	POU5F1	Homeobox,Pou	0.39087	Bilateria	0	0	1	0	Ubiquitous expression
648	M3573_1.02	OVOL2	zf-C2H2	0.39774	Bilateria	0	0	0	0	Ubiquitous expression
649	M3854_1.02	SALL1	zf-C2H2	0.39779	Bilateria	0	0	1	0	Tissue-elevated expression
650	M3528_1.02	MAFB	bZIP_1	0.40203	Bilateria	0	0	0	0	Ubiquitous expression
651	M3791_1.02	PRDM12	zf-C2H2	0.40578	Bilateria	0	0	1	0	Not detected
652	M1418_1.02	C11orf9	NDT80_PhoG	0.41039	Bilateria	0	0	0	0	NA
653	M3339_1.02	NR6A1	zf-C4	0.41107	Bilateria	0	0	0	0	Tissue-elevated expression
654	M4545_1.02	ZNF683	zf-C2H2	0.41295	Bilateria	0	0	0	0	Tissue-elevated expression
655	M3997_1.02	THRA	zf-C4	0.43636	Bilateria	0	0	1	0	Ubiquitous expression
656	M3124_1.02	AC099689.1	zf-C2H2	0.43708	Bilateria	0	0	0	0	NA
657	M3124_1.02	SALL3	zf-C2H2	0.43708	Bilateria	0	0	0	0	Tissue-elevated expression
658	M3124_1.02	SALL4	zf-C2H2	0.43708	Bilateria	0	0	0	0	Tissue-elevated expression
659	M2978_1.02	AL662828.6	bZIP_1	0.44013	Bilateria	0	0	0	0	NA
660	M2978_1.02	ATF6	bZIP_1	0.44013	Bilateria	0	0	0	0	Ubiquitous expression
661	M2978_1.02	ATF6B	bZIP_1	0.44013	Bilateria	0	0	0	0	Ubiquitous expression
662	M2978_1.02	CR753803.1	bZIP_1	0.44013	Bilateria	0	0	0	0	NA
663	M2978_1.02	CR925796.2	bZIP_1	0.44013	Bilateria	0	0	0	0	NA
664	M3998_1.02	THRB	zf-C4	0.44268	Bilateria	0	0	1	0	Ubiquitous expression
665	M4930_1.02	NPAS4	HLH	0.44342	Bilateria	0	0	0	0	Tissue-elevated expression
666	M3915_1.02	SOX6	HMG_box	0.44363	Bilateria	0	0	1	0	Ubiquitous expression
667	M5323_1.02	CREB3L4	bZIP_1	0.44888	Bilateria	0	0	0	0	Ubiquitous expression
668	M6471_1.02	SOX13	HMG_box	0.44988	Bilateria	0	0	1	0	Ubiquitous expression
669	M3913_1.02	SOX5	HMG_box	0.44988	Bilateria	0	0	1	0	Tissue-elevated expression
670	M6432_1.02	PPARD	zf-C4	0.45039	Bilateria	0	0	0	0	Ubiquitous expression
671	M0189_1.02	ID1	HLH	0.45057	Bilateria	0	0	0	0	Ubiquitous expression
672	M0189_1.02	ID2	HLH	0.45057	Bilateria	0	0	0	0	Ubiquitous expression
673	M0189_1.02	ID3	HLH	0.45057	Bilateria	0	0	1	0	Ubiquitous expression
674	M4030_1.02	NFE2L1	bZIP_1	0.45067	Bilateria	0	0	1	0	Ubiquitous expression
675	M4023_1.02	TBX18	T-box	0.45095	Bilateria	0	0	0	0	Ubiquitous expression
676	M3066_1.02	MAF	bZIP_1	0.46748	Bilateria	0	0	0	0	Ubiquitous expression
677	M0594_1.02	LIN54	CXC	0.46856	Bilateria	0	0	0	0	Ubiquitous expression
678	M6515_1.02	TFDP1	DP,E2F_TDP	0.47006	Bilateria	0	0	1	0	Ubiquitous expression
679	M6515_1.02	TFDP2	DP,E2F_TDP	0.47006	Bilateria	0	0	0	0	Ubiquitous expression
680	M6515_1.02	TFDP3	DP,E2F_TDP	0.47006	Bilateria	0	0	0	0	Tissue-elevated expression
681	M6402_1.02	OVOL1	zf-C2H2	0.48629	Bilateria	0	0	0	0	Tissue-elevated expression
682	M1927_1.02	MYCL1	HLH	0.4896	Bilateria	0	0	0	0	NA
683	M3642_1.02	MYCN	HLH	0.4896	Bilateria	0	0	0	0	Tissue-elevated expression
684	M4054_1.02	ETV7	Ets	0.49237	Bilateria	0	0	0	0	Ubiquitous expression
685	M4098_1.02	WT1	zf-C2H2	0.49372	Metazoa	0	0	1	0	Tissue-elevated expression
686	M3781_1.02	PPARA	zf-C4	0.5054	Bilateria	0	0	0	0	Ubiquitous expression
687	M3397_1.02	HMGA1	AT_hook	0.51124	Metazoa	0	0	0	0	Ubiquitous expression
688	M3396_1.02	HMGA2	AT_hook	0.51124	Metazoa	0	0	0	0	Ubiquitous expression
689	M6383_1.02	NR1H2	zf-C4	0.51207	Bilateria	0	0	0	0	Ubiquitous expression
690	M5815_1.02	SOX14	HMG_box	0.51529	Bilateria	0	0	0	0	Tissue-elevated expression
691	M3515_1.02	MAFA	bZIP_1	0.51747	Bilateria	0	0	0	0	Tissue-elevated expression
692	M2968_1.02	ATF2	bZIP_1	0.52757	Bilateria	0	0	1	0	Ubiquitous expression
693	M0300_1.02	CREB5	bZIP_1	0.52757	Bilateria	0	0	0	0	Ubiquitous expression
694	M3664_1.02	NFE2L3	bZIP_1	0.54357	Bilateria	0	0	0	0	Ubiquitous expression
695	M3896_1.02	SMARCC1	Myb	0.54381	Bilateria	0	0	1	0	Ubiquitous expression
696	M1915_1.02	ZNF76	zf-C2H2	0.55096	Bilateria	0	0	1	0	Ubiquitous expression
697	M4037_1.02	TCF7	HMG_box	0.55369	Bilateria	0	0	1	0	Tissue-elevated expression
698	M3263_1.02	FOXM1	Fork_head	0.55692	Bilateria	0	0	1	0	Ubiquitous expression
699	M6157_1.02	BARX2	Homeobox	0.55717	Bilateria	0	0	0	0	Tissue-elevated expression
700	M2986_1.02	BCL11A	zf-C2H2	0.55995	Bilateria	0	0	1	0	Ubiquitous expression
701	M2986_1.02	BCL11B	zf-C2H2	0.55995	Bilateria	0	0	1	0	Tissue-elevated expression
702	M3646_1.02	RARB	zf-C4	0.56479	Bilateria	0	0	0	0	Ubiquitous expression
703	M1435_1.02	RARG	zf-C4	0.56479	Bilateria	0	0	0	0	Ubiquitous expression
704	M0384_1.02	OSR1	zf-C2H2	0.57916	Bilateria	0	0	0	0	Tissue-elevated expression
705	M0384_1.02	OSR2	zf-C2H2	0.57916	Bilateria	0	0	1	0	Tissue-elevated expression
706	M3537_1.02	ASCL1	HLH	0.60384	Bilateria	0	0	0	0	Tissue-elevated expression
707	M6194_1.02	E2F5	E2F_TDP	0.60962	Bilateria	0	0	1	0	Ubiquitous expression
708	M1837_1.02	ENSG00000250096	Runt	0.6176	Bilateria	0	0	0	0	NA
709	M6228_1.02	FOSB	bZIP_1	0.62392	Bilateria	0	0	0	0	Ubiquitous expression
710	M3500_1.02	KLF15	zf-C2H2	0.62705	Metazoa	0	0	0	0	Ubiquitous expression
711	M0200_1.02	NPAS2	HLH	0.62712	Bilateria	0	0	0	0	Ubiquitous expression
712	M5304_1.02	BHLHA15	HLH	0.6462	Bilateria	0	0	0	0	Tissue-elevated expression
713	M4527_1.02	SMARCC2	Myb	0.65107	Bilateria	0	0	1	0	Ubiquitous expression
714	M4148_1.02	ZIC2	zf-C2H2	0.65976	Bilateria	0	0	1	0	Tissue-elevated expression
715	M2259_1.02	ZIC5	zf-C2H2	0.65976	Bilateria	0	0	0	0	Tissue-elevated expression
716	M3874_1.02	SIX5	Homeobox	0.66665	Bilateria	0	0	1	0	Ubiquitous expression
717	M5116_1.02	ATOH8	HLH	0.6682	Bilateria	0	0	0	0	Ubiquitous expression
718	M0178_1.02	ASCL2	HLH	0.67057	Bilateria	0	0	0	0	Ubiquitous expression
719	M3275_1.02	FOXO1	Fork_head	0.67909	Metazoa	0	0	0	0	Ubiquitous expression
720	M3341_1.02	GFI1	zf-C2H2	0.67924	Bilateria	0	0	0	0	Tissue-elevated expression
721	M3342_1.02	GFI1B	zf-C2H2	0.67924	Bilateria	0	0	1	0	Tissue-elevated expression
722	M1035_1.02	ENSG00000234254	Homeobox	0.68104	Bilateria	0	0	0	0	NA
723	M1061_1.02	TGIF2LY	Homeobox	0.68104	Bilateria	0	0	0	0	Tissue-elevated expression
724	M3615_1.02	NFAT5	RHD	0.68156	Bilateria	0	0	0	0	Ubiquitous expression
725	M3212_1.02	ESRRG	zf-C4	0.68434	Bilateria	0	0	0	0	Tissue-elevated expression
726	M3300_1.02	NR1H4	zf-C4	0.68571	Bilateria	0	0	0	0	Tissue-elevated expression
727	M3764_1.02	NR2E3	zf-C4	0.6876	Bilateria	0	0	0	0	NA
728	M6268_1.02	HAND1	HLH	0.70463	Bilateria	0	0	0	0	Tissue-elevated expression
729	M4996_1.02	HAND2	HLH	0.70726	Bilateria	0	0	0	0	Ubiquitous expression
730	M2052_1.02	ENSG00000229544	Homeobox	0.71084	Bilateria	0	0	0	0	NA
731	M2052_1.02	NKX1-1	Homeobox	0.71084	Bilateria	0	0	0	0	Not detected
732	M3437_1.02	HOXD10	Homeobox	0.7116	Bilateria	0	0	0	0	Tissue-elevated expression
733	M1628_1.02	TBX10	T-box	0.71433	Bilateria	0	0	0	0	Tissue-elevated expression
734	M3810_1.02	RBPJ	LAG1-DNAbind	0.71518	Bilateria	0	0	0	0	Ubiquitous expression
735	M0305_1.02	CREB3L2	bZIP_1	0.7165	Bilateria	0	0	0	0	Ubiquitous expression
736	M0305_1.02	CREB3L3	bZIP_1	0.7165	Bilateria	0	0	0	0	Tissue-elevated expression
737	M2025_1.02	CDX4	Homeobox	0.71911	Bilateria	0	0	0	0	Not detected
738	M3825_1.02	NR1D1	zf-C4	0.72011	Bilateria	0	0	0	0	Ubiquitous expression
739	M3825_1.02	NR1D2	zf-C4	0.72011	Bilateria	0	0	0	0	Ubiquitous expression
740	M3378_1.02	HES1	HLH	0.72267	Bilateria	0	0	1	0	Ubiquitous expression
741	M0191_1.02	HES2	HLH	0.72267	Bilateria	0	0	0	0	Tissue-elevated expression
742	M2253_1.02	HES4	HLH	0.72267	Bilateria	0	0	0	0	Ubiquitous expression
743	M0633_1.02	DMRT2	DM	0.72358	Bilateria	0	0	0	0	Tissue-elevated expression
744	M1432_1.02	NR2E1	zf-C4	0.72842	Bilateria	0	0	0	0	Tissue-elevated expression
745	M3299_1.02	NR1H3	zf-C4	0.72895	Bilateria	0	0	0	0	Ubiquitous expression
746	M1110_1.02	HHEX	Homeobox	0.7382	Bilateria	0	0	1	0	Tissue-elevated expression
747	M3828_1.02	ZFP42	zf-C2H2	0.7428	Metazoa	0	0	0	0	Tissue-elevated expression
748	M3348_1.02	GLI1	zf-C2H2	0.74655	Bilateria	0	0	0	0	Tissue-elevated expression
749	M3351_1.02	GLI3	zf-C2H2	0.74655	Bilateria	0	0	0	0	Ubiquitous expression
750	M0904_1.02	HOXA11	Homeobox	0.74698	Bilateria	0	0	0	0	Tissue-elevated expression
751	M6146_1.02	TFAP2D	TF_AP-2	0.75323	Bilateria	0	0	0	0	Not detected
752	M3236_1.02	KLF11	zf-C2H2	0.75666	Bilateria	0	0	1	0	Ubiquitous expression
753	M2320_1.02	TFAP2E	TF_AP-2	0.75851	Bilateria	0	0	0	0	Tissue-elevated expression
754	M1983_1.02	DBX2	Homeobox	0.76518	Bilateria	0	0	0	0	Tissue-elevated expression
755	M1983_1.02	HLX	Homeobox	0.76518	Bilateria	0	0	0	0	Ubiquitous expression
756	M0214_1.02	ENSG00000187728	HLH	0.76681	Bilateria	0	0	0	0	NA
757	M0195_1.02	TCF21	HLH	0.76681	Bilateria	0	0	0	0	Ubiquitous expression
758	M0195_1.02	TCF23	HLH	0.76681	Bilateria	0	0	0	0	Tissue-elevated expression
759	M2960_1.02	NR2F2	zf-C4	0.76722	Bilateria	0	0	1	0	Tissue-elevated expression
760	M1434_1.02	NR2F6	zf-C4	0.76722	Bilateria	0	0	1	0	Ubiquitous expression
761	M6441_1.02	PTF1A	HLH	0.76889	Bilateria	0	0	0	0	Tissue-elevated expression
762	M5345_1.02	DMBX1	Homeobox	0.76928	Bilateria	0	0	0	0	Not detected
763	M3392_1.02	EPAS1	HLH	0.7702	Bilateria	0	0	0	0	Ubiquitous expression
764	M4006_1.02	TAL1	HLH	0.77049	Bilateria	0	0	1	0	Tissue-elevated expression
765	M4006_1.02	TAL2	HLH	0.77049	Bilateria	0	0	0	0	Tissue-elevated expression
766	M1880_1.02	LYL1	HLH	0.77584	Bilateria	0	0	0	0	Tissue-elevated expression
767	M1880_1.02	NHLH2	HLH	0.77584	Bilateria	0	0	0	0	Tissue-elevated expression
768	M2956_1.02	ARNT	HLH	0.77947	Bilateria	0	0	1	0	Ubiquitous expression
769	M6150_1.02	ARNT2	HLH	0.77947	Bilateria	0	0	0	0	Tissue-elevated expression
770	M5290_1.02	ARNTL	HLH	0.77947	Bilateria	0	0	0	0	Ubiquitous expression
771	M0220_1.02	ARNTL2	HLH	0.77947	Bilateria	0	0	0	0	Tissue-elevated expression
772	M3538_1.02	ATOH1	HLH	0.78017	Bilateria	0	0	0	0	Tissue-elevated expression
773	M2264_1.02	ATOH7	HLH	0.78017	Bilateria	0	0	0	0	Tissue-elevated expression
774	M6504_1.02	TBX3	T-box	0.78104	Bilateria	0	0	1	0	Tissue-elevated expression
775	M1960_1.02	SOX1	HMG_box	0.78192	Bilateria	0	0	0	0	Tissue-elevated expression
776	M3909_1.02	SOX2	HMG_box	0.78192	Bilateria	0	0	0	1	Tissue-elevated expression
777	M5518_1.02	HMX1	Homeobox	0.79367	Bilateria	0	0	0	0	Not detected
778	M5519_1.02	HMX2	Homeobox	0.79367	Bilateria	0	0	0	0	Tissue-elevated expression
779	M5520_1.02	HMX3	Homeobox	0.79367	Bilateria	0	0	0	0	Not detected
780	M3670_1.02	NR4A1	zf-C4	0.79691	Bilateria	0	0	1	0	Ubiquitous expression
781	M3013_1.02	KLF10	zf-C2H2	0.79697	Metazoa	0	0	0	0	Ubiquitous expression
782	M3013_1.02	KLF9	zf-C2H2	0.79697	Metazoa	0	0	1	0	Ubiquitous expression
783	M1959_1.02	AL662833.4	Homeobox,Pou	0.7983	Bilateria	0	0	0	0	NA
784	M1959_1.02	AL773544.1	Homeobox,Pou	0.7983	Bilateria	0	0	0	0	NA
785	M1959_1.02	BX088580.2	Homeobox,Pou	0.7983	Bilateria	0	0	0	0	NA
786	M1959_1.02	CR388229.2	Homeobox,Pou	0.7983	Bilateria	0	0	0	0	NA
787	M1959_1.02	CR759815.4	Homeobox,Pou	0.7983	Bilateria	0	0	0	0	NA
788	M4079_1.02	TWIST1	HLH	0.79868	Bilateria	0	0	0	0	Tissue-elevated expression
789	M0632_1.02	DMRTA2	DM	0.79902	Bilateria	0	0	0	0	Not detected
790	M3840_1.02	RORB	zf-C4	0.79998	Bilateria	0	0	0	0	Tissue-elevated expression
791	M6455_1.02	RORC	zf-C4	0.79998	Bilateria	0	0	0	0	Ubiquitous expression
792	M0177_1.02	SCXA	HLH	0.80373	Bilateria	0	0	0	0	Tissue-elevated expression
793	M0177_1.02	SCXB	HLH	0.80373	Bilateria	0	0	0	0	Tissue-elevated expression
794	M0177_1.02	TCF15	HLH	0.80373	Bilateria	0	0	0	0	Tissue-elevated expression
795	M2056_1.02	TWIST2	HLH	0.80373	Bilateria	0	0	0	0	Tissue-elevated expression
796	M2917_1.02	AHR	HLH	0.80395	Bilateria	0	0	0	0	Ubiquitous expression
797	M2917_1.02	AHRR	HLH	0.80395	Bilateria	0	0	0	0	Tissue-elevated expression
798	M1977_1.02	BARHL1	Homeobox	0.80406	Bilateria	0	0	0	0	Not detected
799	M6389_1.02	NR2C1	zf-C4	0.81023	Bilateria	0	0	1	0	Ubiquitous expression
800	M4969_1.02	FERD3L	HLH	0.81212	Bilateria	0	0	0	0	Not detected
801	M6525_1.02	TLX1	Homeobox	0.81856	Bilateria	0	0	0	0	Tissue-elevated expression
802	M0891_1.02	TLX2	Homeobox	0.81856	Bilateria	0	0	0	0	Tissue-elevated expression
803	M1979_1.02	TLX3	Homeobox	0.81856	Bilateria	0	0	0	0	Not detected
804	M1850_1.02	AL662824.5	zf-C4	0.82646	Bilateria	0	0	0	0	NA
805	M1850_1.02	AL844527.7	zf-C4	0.82646	Bilateria	0	0	0	0	NA
806	M1850_1.02	CR354565.3	zf-C4	0.82646	Bilateria	0	0	0	0	NA
807	M1850_1.02	CR759733.4	zf-C4	0.82646	Bilateria	0	0	0	0	NA
808	M1850_1.02	CR936877.3	zf-C4	0.82646	Bilateria	0	0	0	0	NA
809	M3849_1.02	RXRA	zf-C4	0.82646	Bilateria	0	0	0	0	Ubiquitous expression
810	M5729_1.02	POU2F3	Homeobox,Pou	0.83492	Bilateria	0	0	0	0	Tissue-elevated expression
811	M4840_1.02	FEZF1	zf-C2H2	0.83652	Bilateria	0	0	1	0	Tissue-elevated expression
812	M4840_1.02	FEZF2	zf-C2H2	0.83652	Bilateria	0	0	0	0	Tissue-elevated expression
813	M3388_1.02	HIF1A	HLH	0.83708	Bilateria	0	0	0	0	Ubiquitous expression
814	M5234_1.02	ENSG00000250811	HLH	0.83713	Bilateria	0	0	0	0	NA
815	M5234_1.02	NPAS1	HLH	0.83713	Bilateria	0	0	0	0	Tissue-elevated expression
816	M5234_1.02	NPAS3	HLH	0.83713	Bilateria	0	0	0	0	Tissue-elevated expression
817	M5234_1.02	SIM1	HLH	0.83713	Bilateria	0	0	0	0	Tissue-elevated expression
818	M5234_1.02	SIM2	HLH	0.83713	Bilateria	0	0	0	0	Tissue-elevated expression
819	M3748_1.02	PITX1	Homeobox	0.8393	Bilateria	0	0	0	0	Tissue-elevated expression
820	M3750_1.02	PITX2	Homeobox	0.8393	Bilateria	0	0	0	0	Tissue-elevated expression
821	M3883_1.02	SMAD4	MH1	0.85202	Metazoa	0	0	1	0	Ubiquitous expression
822	M5807_1.02	SHOX2	Homeobox	0.85319	Bilateria	0	0	0	0	Tissue-elevated expression
823	M5342_1.02	DLX4	Homeobox	0.85496	Bilateria	0	0	0	0	Tissue-elevated expression
824	M6395_1.02	NR4A3	zf-C4	0.85697	Bilateria	0	0	0	0	Tissue-elevated expression
825	M1954_1.02	LHX1	Homeobox	0.85792	Bilateria	0	0	0	0	Tissue-elevated expression
826	M3511_1.02	LHX3	Homeobox	0.85792	Bilateria	0	0	0	0	Not detected
827	M1954_1.02	LHX4	Homeobox	0.85792	Bilateria	0	0	0	0	Ubiquitous expression
828	M1954_1.02	LHX5	Homeobox	0.85792	Bilateria	0	0	0	0	Not detected
829	M5340_1.02	DLX2	Homeobox	0.86003	Bilateria	0	0	0	0	Not detected
830	M5341_1.02	DLX3	Homeobox	0.86003	Bilateria	0	0	0	0	Tissue-elevated expression
831	M3116_1.02	DLX5	Homeobox	0.86003	Bilateria	0	0	0	0	Tissue-elevated expression
832	M3863_1.02	NR5A1	zf-C4	0.86114	Bilateria	0	0	0	0	Tissue-elevated expression
833	M3520_1.02	NR5A2	zf-C4	0.86114	Bilateria	0	0	0	0	Tissue-elevated expression
834	M3566_1.02	MITF	HLH	0.86467	Metazoa	0	0	1	0	Ubiquitous expression
835	M3608_1.02	NFIB	MH1	0.87078	Metazoa	0	0	1	0	Ubiquitous expression
836	M2000_1.02	NKX6-3	Homeobox	0.87119	Bilateria	0	0	0	0	Tissue-elevated expression
837	M5339_1.02	DLX1	Homeobox	0.87234	Bilateria	0	0	0	0	Tissue-elevated expression
838	M3430_1.02	HOXA9	Homeobox	0.87983	Bilateria	0	0	0	0	Tissue-elevated expression
839	M3438_1.02	HOXD9	Homeobox	0.87983	Bilateria	0	0	0	0	Tissue-elevated expression
840	M2283_1.02	FOXP4	Fork_head	0.88735	Metazoa	0	0	0	0	Ubiquitous expression
841	M3123_1.02	ARID3A	ARID	0.8892	Metazoa	0	0	1	0	Tissue-elevated expression
842	M1967_1.02	ARID3B	ARID	0.8892	Metazoa	0	0	0	0	Ubiquitous expression
843	M1967_1.02	ARID3C	ARID	0.8892	Metazoa	0	0	0	0	Tissue-elevated expression
844	M3588_1.02	MYF5	HLH	0.88929	Bilateria	0	0	0	0	Tissue-elevated expression
845	M3589_1.02	MYOD1	HLH	0.88929	Bilateria	0	0	0	0	Tissue-elevated expression
846	M3592_1.02	MYOG	HLH	0.88929	Bilateria	0	0	0	0	Tissue-elevated expression
847	M5581_1.02	IRX2	Homeobox	0.89016	Bilateria	0	0	0	0	Tissue-elevated expression
848	M5582_1.02	IRX5	Homeobox	0.89016	Bilateria	0	0	0	0	Tissue-elevated expression
849	M2019_1.02	IRX1	Homeobox	0.89156	Bilateria	0	0	0	0	Tissue-elevated expression
850	M2019_1.02	IRX3	Homeobox	0.89156	Bilateria	0	0	0	0	Tissue-elevated expression
851	M2019_1.02	IRX4	Homeobox	0.89156	Bilateria	0	0	0	0	Tissue-elevated expression
852	M2019_1.02	IRX6	Homeobox	0.89156	Bilateria	0	0	0	0	Tissue-elevated expression
853	M3331_1.02	GATA4	GATA	0.89162	Bilateria	0	0	1	1	Tissue-elevated expression
854	M3729_1.02	PAX8	PAX	0.89534	Bilateria	0	0	1	0	Tissue-elevated expression
855	M3741_1.02	PBX4	Homeobox	0.90031	Bilateria	0	0	0	0	Tissue-elevated expression
856	M2008_1.02	SIX6	Homeobox	0.90038	Bilateria	0	0	0	0	Not detected
857	M3605_1.02	NEUROD1	HLH	0.9016	Bilateria	0	0	0	0	Tissue-elevated expression
858	M2264_1.02	NEUROD4	HLH	0.9016	Bilateria	0	0	0	0	Tissue-elevated expression
859	M2264_1.02	NEUROD6	HLH	0.9016	Bilateria	0	0	0	0	Tissue-elevated expression
860	M3605_1.02	NEUROG1	HLH	0.9016	Bilateria	0	0	0	0	Not detected
861	M3605_1.02	NEUROG3	HLH	0.9016	Bilateria	0	0	0	0	Tissue-elevated expression
862	M5533_1.02	HOXA1	Homeobox	0.9016	Bilateria	0	0	0	0	Tissue-elevated expression
863	M3433_1.02	HOXA3	Homeobox	0.9016	Bilateria	0	0	0	0	Ubiquitous expression
864	M6295_1.02	HOXB1	Homeobox	0.9016	Bilateria	0	0	0	0	Not detected
865	M2038_1.02	HOXD1	Homeobox	0.9016	Bilateria	0	0	0	0	Tissue-elevated expression
866	M6413_1.02	PBX2	Homeobox	0.9016	Bilateria	0	0	1	0	Ubiquitous expression
867	M4473_1.02	PBX3	Homeobox	0.9016	Bilateria	0	0	0	0	Ubiquitous expression
868	M3631_1.02	NKX2-2	Homeobox	0.9029	Bilateria	0	0	0	0	Tissue-elevated expression
869	M0183_1.02	HEYL	HLH	0.90381	Metazoa	0	0	0	0	Ubiquitous expression
870	M4010_1.02	TBP	TBP	0.90666	Metazoa	0	0	1	0	Ubiquitous expression
871	M2191_1.02	TBPL2	TBP	0.90666	Metazoa	0	0	0	0	Not detected
872	M3311_1.02	GATA1	GATA	0.91309	Bilateria	0	0	1	0	Tissue-elevated expression
873	M3334_1.02	GATA6	GATA	0.91309	Bilateria	0	0	0	0	Ubiquitous expression
874	M3878_1.02	SMAD1	MH1	0.91407	Metazoa	0	0	0	0	Ubiquitous expression
875	M3886_1.02	SMAD5	MH1	0.91407	Metazoa	0	0	1	0	Ubiquitous expression
876	M3893_1.02	SMAD9	MH1	0.91407	Metazoa	0	0	0	0	Tissue-elevated expression
877	M1906_1.02	SP5	zf-C2H2	0.91726	Metazoa	0	0	1	0	Ubiquitous expression
878	M1906_1.02	SP6	zf-C2H2	0.91726	Metazoa	0	0	0	0	Tissue-elevated expression
879	M1906_1.02	SP7	zf-C2H2	0.91726	Metazoa	0	0	1	0	Not detected
880	M1906_1.02	SP9	zf-C2H2	0.91726	Metazoa	0	0	0	0	Not detected
881	M3603_1.02	ELF2	Ets	0.91778	Bilateria	0	0	0	0	Ubiquitous expression
882	M3632_1.02	NKX2-5	Homeobox	0.92018	Metazoa	0	0	0	0	Tissue-elevated expression
883	M4107_1.02	CSDA	CSD	0.92292	Metazoa	0	0	0	0	NA
884	M4107_1.02	YBX1	CSD	0.92292	Metazoa	0	0	1	0	Ubiquitous expression
885	M4107_1.02	YBX2	CSD	0.92292	Metazoa	0	0	0	0	Tissue-elevated expression
886	M1918_1.02	AC012531.1	Homeobox	0.92307	Bilateria	0	0	0	0	NA
887	M1898_1.02	AL662830.5	Homeobox	0.92307	Bilateria	0	0	0	0	NA
888	M1898_1.02	AL845464.3	Homeobox	0.92307	Bilateria	0	0	0	0	NA
889	M1898_1.02	BX284686.1	Homeobox	0.92307	Bilateria	0	0	0	0	NA
890	M1898_1.02	BX927239.6	Homeobox	0.92307	Bilateria	0	0	0	0	NA
891	M1898_1.02	CR812478.2	Homeobox	0.92307	Bilateria	0	0	0	0	NA
892	M1898_1.02	CR933878.8	Homeobox	0.92307	Bilateria	0	0	0	0	NA
893	M3434_1.02	HOXA4	Homeobox	0.92307	Bilateria	0	0	0	0	Tissue-elevated expression
894	M1918_1.02	HOXA6	Homeobox	0.92307	Bilateria	0	0	0	0	Ubiquitous expression
895	M3435_1.02	HOXA7	Homeobox	0.92307	Bilateria	0	0	0	0	Ubiquitous expression
896	M1918_1.02	HOXB4	Homeobox	0.92307	Bilateria	0	0	0	0	Tissue-elevated expression
897	M5543_1.02	HOXB5	Homeobox	0.92307	Bilateria	0	0	0	0	Tissue-elevated expression
898	M6296_1.02	HOXB6	Homeobox	0.92307	Bilateria	0	0	0	0	Tissue-elevated expression
899	M6297_1.02	HOXB7	Homeobox	0.92307	Bilateria	0	0	0	0	Ubiquitous expression
900	M6298_1.02	HOXB8	Homeobox	0.92307	Bilateria	0	0	0	0	Tissue-elevated expression
901	M1974_1.02	HOXB9	Homeobox	0.92307	Bilateria	0	0	0	0	Tissue-elevated expression
902	M1918_1.02	HOXC5	Homeobox	0.92307	Bilateria	0	0	0	0	Tissue-elevated expression
903	M6299_1.02	HOXC6	Homeobox	0.92307	Bilateria	0	0	0	0	Tissue-elevated expression
904	M6300_1.02	HOXC8	Homeobox	0.92307	Bilateria	0	0	0	0	Tissue-elevated expression
905	M1974_1.02	HOXC9	Homeobox	0.92307	Bilateria	0	0	0	0	Tissue-elevated expression
906	M1918_1.02	HOXD3	Homeobox	0.92307	Bilateria	0	0	0	0	Tissue-elevated expression
907	M6303_1.02	HOXD4	Homeobox	0.92307	Bilateria	0	0	0	0	Tissue-elevated expression
908	M5563_1.02	HOXD8	Homeobox	0.92307	Bilateria	0	0	0	0	Tissue-elevated expression
909	M1884_1.02	AC002126.6	SRF-TF	0.92307	Bilateria	0	0	0	0	NA
910	M4479_1.02	TCF12	HLH	0.92314	Metazoa	0	0	1	0	Ubiquitous expression
911	M4096_1.02	FOXN1	Fork_head	0.92668	Metazoa	0	0	0	0	Tissue-elevated expression
912	M3269_1.02	FOXN2	Fork_head	0.92668	Metazoa	0	0	0	0	Ubiquitous expression
913	M3271_1.02	FOXN4	Fork_head	0.92668	Metazoa	0	0	0	0	Tissue-elevated expression
914	M2942_1.02	KLF12	zf-C2H2	0.9353	Metazoa	0	0	0	0	Ubiquitous expression
915	M3501_1.02	KLF3	zf-C2H2	0.9353	Metazoa	0	0	0	0	Ubiquitous expression
916	M3082_1.02	KLF6	zf-C2H2	0.9353	Metazoa	0	0	1	0	Ubiquitous expression
917	M6326_1.02	KLF8	zf-C2H2	0.9353	Metazoa	0	0	1	0	Tissue-elevated expression
918	M3018_1.02	CDC5L	Myb	0.9448	Metazoa	0	0	1	0	Ubiquitous expression
919	M3094_1.02	CRX	Homeobox	0.95159	Metazoa	0	0	0	0	Not detected
920	M3093_1.02	CREM	bZIP_1	0.95461	Metazoa	0	0	1	0	Ubiquitous expression
921	M2965_1.02	ATF1	bZIP_1	0.95468	Metazoa	0	0	1	0	Ubiquitous expression
922	M3796_1.02	PRRX2	Homeobox	0.95677	Metazoa	0	0	0	0	Tissue-elevated expression
923	M3484_1.02	ISL1	Homeobox	0.95987	Metazoa	0	0	0	0	Tissue-elevated expression
924	M3181_1.02	KLF1	zf-C2H2	0.97853	Metazoa	0	0	1	0	Tissue-elevated expression
925	M3514_1.02	KLF2	zf-C2H2	0.97853	Metazoa	0	0	0	0	Ubiquitous expression
926	M3345_1.02	KLF4	zf-C2H2	0.97853	Metazoa	0	0	1	1	Ubiquitous expression
927	M1871_1.02	KLF7	zf-C2H2	0.97853	Metazoa	0	0	1	0	Ubiquitous expression
928	M2053_1.02	SIX1	Homeobox	0.98416	Metazoa	0	0	0	0	Tissue-elevated expression
929	M2053_1.02	SIX2	Homeobox	0.98416	Metazoa	0	0	0	0	Tissue-elevated expression
930	M2008_1.02	SIX3	Homeobox	0.98416	Metazoa	0	0	0	0	Not detected
931	M2013_1.02	SIX4	Homeobox	0.98416	Metazoa	0	0	1	0	Tissue-elevated expression
932	M4067_1.02	NKX2-1	Homeobox	0.98488	Metazoa	0	0	0	0	Tissue-elevated expression
933	M1892_1.02	NKX2-4	Homeobox	0.98488	Metazoa	0	0	0	0	Not detected
934	M1892_1.02	NKX2-6	Homeobox	0.98488	Metazoa	0	0	0	0	NA
935	M2170_1.02	ARID2	ARID,RFX	1	Metazoa	0	0	0	0	Ubiquitous expression
936	M1891_1.02	ENSG00000235187	Ets	1	Metazoa	0	0	0	0	NA
937	M3224_1.02	ETS2	Ets	1	Metazoa	0	0	1	0	Ubiquitous expression
938	M4567_1.02	FOXA2	Fork_head	1	Metazoa	0	0	1	1	Tissue-elevated expression
939	M3413_1.02	FOXA3	Fork_head	1	Metazoa	0	0	1	0	Tissue-elevated expression
940	M1862_1.02	FOXB2	Fork_head	1	Metazoa	0	0	0	0	Not detected
941	M3250_1.02	FOXD3	Fork_head	1	Metazoa	0	0	0	1	Not detected
942	M1862_1.02	FOXD4	Fork_head	1	Metazoa	0	0	0	0	Not detected
943	M1862_1.02	FOXD4L1	Fork_head	1	Metazoa	0	0	0	0	Not detected
944	M3251_1.02	FOXD4L2	Fork_head	1	Metazoa	0	0	0	0	Not detected
945	M1862_1.02	FOXD4L3	Fork_head	1	Metazoa	0	0	0	0	Not detected
946	M3252_1.02	FOXD4L4	Fork_head	1	Metazoa	0	0	0	0	Not detected
947	M1862_1.02	FOXD4L5	Fork_head	1	Metazoa	0	0	0	0	Not detected
948	M1862_1.02	FOXD4L6	Fork_head	1	Metazoa	0	0	0	0	Not detected
949	M1862_1.02	FOXE1	Fork_head	1	Metazoa	0	0	0	1	Tissue-elevated expression
950	M1862_1.02	FOXE3	Fork_head	1	Metazoa	0	0	0	0	Not detected
951	M3235_1.02	FOXF1	Fork_head	1	Metazoa	0	0	0	0	Ubiquitous expression
952	M1862_1.02	FOXI2	Fork_head	1	Metazoa	0	0	0	0	Tissue-elevated expression
953	M3384_1.02	FOXJ1	Fork_head	1	Metazoa	0	0	0	0	Tissue-elevated expression
954	M3256_1.02	FOXJ2	Fork_head	1	Metazoa	0	0	1	0	Ubiquitous expression
955	M5456_1.02	FOXJ3	Fork_head	1	Metazoa	0	0	0	0	Ubiquitous expression
956	M0718_1.02	FOXK1	Fork_head	1	Metazoa	0	0	0	0	Ubiquitous expression
957	M1862_1.02	FOXK2	Fork_head	1	Metazoa	0	0	1	0	Ubiquitous expression
958	M3262_1.02	FOXL2	Fork_head	1	Metazoa	0	0	0	0	Tissue-elevated expression
959	M0721_1.02	FOXN3	Fork_head	1	Metazoa	0	0	0	0	Ubiquitous expression
960	M6250_1.02	FOXQ1	Fork_head	1	Metazoa	0	0	0	0	Tissue-elevated expression
961	M1862_1.02	FOXS1	Fork_head	1	Metazoa	0	0	0	0	Ubiquitous expression
962	M1862_1.02	KIAA0415	Fork_head	1	Metazoa	0	0	0	0	NA
963	M3016_1.02	ALX1	Homeobox	1	Metazoa	0	0	0	0	Tissue-elevated expression
964	M2923_1.02	ALX4	Homeobox	1	Metazoa	0	0	0	0	Tissue-elevated expression
965	M5291_1.02	ARX	Homeobox	1	Metazoa	0	0	0	0	Tissue-elevated expression
966	M5348_1.02	DRGX	Homeobox	1	Metazoa	0	0	0	0	Tissue-elevated expression
967	M1981_1.02	OTP	Homeobox	1	Metazoa	0	0	0	0	Not detected
968	M5715_1.02	PHOX2B	Homeobox	1	Metazoa	0	0	0	0	Tissue-elevated expression
969	M3166_1.02	RFX1	RFX	1	Metazoa	0	0	1	1	Ubiquitous expression
970	M2170_1.02	RFX6	RFX	1	Metazoa	0	0	0	1	Tissue-elevated expression
971	M2170_1.02	RFX7	RFX	1	Metazoa	0	0	0	1	Ubiquitous expression
972	M2170_1.02	RFX8	RFX	1	Metazoa	0	0	0	1	Tissue-elevated expression
